## Microbiota colonization tunes the antigen threshold of microbiota-specific T cell activation in the gut

Authors:

- [Hoces](#), Daniel<sup>1</sup>
- [Corak](#), Basak<sup>1,#a</sup>
- [Estrada Brull](#), Anna<sup>2</sup>
- [Berent](#), Sara<sup>1,#b</sup>
- [Faccin](#), Erica<sup>1</sup>
- [Moresi](#), Claudia<sup>1</sup>
- [Keys](#), Tim<sup>1</sup>
- [Joller](#), Nicole<sup>2</sup>
- [Slack](#), Emma<sup>1,\*</sup>

1. Laboratory for Food Immunology, Institute of Food, Nutrition and Health, Department of Health Sciences and Technology, ETH Zürich, Zurich, Switzerland
2. Department of Quantitative Biomedicine, University of Zurich, Zurich, Switzerland

Current affiliation:

#a: Immunophysiology, Institute of Physiology, University of Zurich, Zurich, Switzerland

#b: The Walter and Eliza Hall Institute of Medical Research, Melbourne, Australia

\*Corresponding author:

Emma Slack

Vladimir-Prelog-Weg 1-5, HCI E365.1

8093 Zürich, Switzerland

E-Mail: [emma.slack@hest.ethz.edu](mailto:emma.slack@hest.ethz.edu)

**KEYWORDS:** Microbiota, T cells, Mucosal Immunology

**ABBREVIATIONS:**

- B6: C57BL/6 mice
- *B.theta*: *Bacterioides thetaiotaomicron*
- B $\theta$ OM: T-cell receptor transgenic specific for *B.theta* BT4295 epitope
- CFU: colony-forming units
- CTV: CellTrace Violet
- GF: Germ-free
- LCMV: Lymphocytic choriomeningitis virus
- mLN: mesenteric lymph nodes
- *Rag1*<sup>-/-</sup>: RAG1 knock-out mice
- SM-1: T-cell receptor transgenic specific for LCMV BT4295 epitope
- SPF: Specific-pathogen free
- TCR-Tg: T-cell receptor transgenic
- Treg: regulatory T cell

## 1 **ABSTRACT**

2 Harnessing the potential of commensal bacteria for immunomodulatory therapy in the gut  
3 requires the identification of conditions that modulate immune activation towards incoming  
4 colonizing bacteria. In this study, we used the commensal *Bacteroides thetaiotaomicron*  
5 (*B.theta*) and combined it with *B.theta*-specific transgenic T cells, in the context of defined  
6 colonization of gnotobiotic and immunodeficiency mouse models, to probe the factors  
7 modulating bacteria-specific T cell activation against newly colonizing bacteria. After colonizing  
8 germ-free (GF) and conventionally raised (SPF) mice with *B.theta*, we only observed  
9 proliferation of *B.theta*-specific T cells in GF mice. Using simple gnotobiotic communities we  
10 could further demonstrate that T-cell activation against newly colonizing gut bacteria is  
11 restricted by previous bacteria colonization in GF mice. However, this restriction requires a  
12 functional adaptive immune system as *Rag1*<sup>-/-</sup> allowed *B.theta*-specific T cell proliferation even  
13 after previous colonization. Interestingly, this phenomenon seems to be dependent on the type  
14 of TCR-transgenic model used. *B.theta*-specific transgenic T cells also proliferated after gut  
15 colonization with an *E.coli* strain carrying the *B.theta*-specific epitope. However, this was not  
16 the case for the SM-1 transgenic T cells as they did not proliferate after similar gut colonization  
17 with an *E.coli* strain expressing the cognate epitope. In summary, we found that activation of  
18 T cells towards incoming bacteria in the gut is modulated by the influence of colonizing bacteria  
19 on the adaptive immune system of the host.

## 20 INTRODUCTION

21 The gut harbors the highest concentration of bacteria present in our body, reaching densities  
22 up to  $10^{10}$  to  $10^{11}$  CFUg<sup>-1</sup> of content[1]. Although most gut colonizing bacteria are excluded from  
23 immune cells by a series of barriers such the mucus layer and epithelium[2], there is clear  
24 evidence that a fraction of the microbiota is sampled and presented to T cells, inducing immune  
25 activation and proliferation without tissue damage[3]. Commensals interact with the immune  
26 system, for example by imprinting a particular phenotype on T cells[4],[5] and regulate the  
27 balance between health and disease states[6].

28 Although there is a clear potential for immunomodulatory therapy based on microbiota  
29 engineering, we still lack fundamental knowledge on the immunity-microbiota balance. For  
30 example, it is assumed that the microbiota constantly calibrates the immune threshold of  
31 activation, which then promotes protective immunity against infectious agents[7]. In addition,  
32 certain commensals can induce immune activation of antigen-specific T cells and their  
33 differentiation into regulatory T cells (Treg)[8],[9]. However, the commensal antigenic load  
34 needed to initiate T cell activation in the gut microenvironment is not known. Understanding  
35 the modulation of these antigenic thresholds is important as it would serve as a goal for any  
36 microbiota engineering therapy either based on the insertion or deletion of a particular  
37 immunomodulatory microbe into the community.

38 In this study, we combined bacteria-specific TCR-Tg T cells with bacteria mutants, gnotobiotic  
39 and immunodeficiency mouse models to probe the antigenic threshold of activation for  
40 microbiota-specific T cells in the gut under homeostatic conditions. We found that T cell  
41 activation and proliferation in the gut is controlled by the combination of the bacterial chassis  
42 carrying the antigen, previous bacteria colonization and a functional adaptive immune system.

## 43 RESULTS

### 44 ***B*ΘOM T cells proliferation is restricted in colonized mice**

45 To explore the host conditions under which *B.theta* can induce antigen-specific immune  
46 activation during gut colonization, we used T-cell receptor transgenic (TCR-Tg) T cells that  
47 recognize an outer membrane protein of *B.theta* (BΘOM T cells)[10]. We colonized germ-free  
48 (GF) and conventional (SPF) mice with *B.theta* before transferring CD45.1+ BΘOM T cells  
49 labelled with a CellTrace Violet (CTV) (Fig.1A). Seven days later, we identified the activated  
50 BΘOM T cells in the spleen and mLN (Fig.1B, Suppl.Fig.1).

51 In GF mice, *B.theta* colonization (Fig.1C) significantly increases the percentage of BΘOM T  
52 cells that divided, become activated and expand in the spleen and mLN compared to control  
53 mice (Fig.1D). However, in SPF mice, there was no significant effect of *B.theta* colonization on  
54 BΘOM T cell proliferation (Fig.1E). This differential activation of BΘOM T cells by *B.theta*  
55 colonization in GF compared to SPF mice is not observed when mice are challenged  
56 systemically (Suppl.Fig.2A), as BΘOM T cells show a similar activation pattern in both GF and  
57 SPF mice (Suppl.Fig.2B).

58 One hypothesis for restriction of T cell proliferation in SPF mice is that the lower level of *B.theta*  
59 colonization in the gut (Suppl.Fig.3A) may also reduce bacterial translocation, and therefore  
60 antigen availability for BΘOM T cells in gut-draining lymphoid tissues. Although presence of  
61 live bacterial colony-forming units (CFU) was highly variable between mice in the same groups,  
62 we observed no significant difference in bacterial translocation into the mLN between GF and  
63 SPF mice 22 hours after inoculum (Suppl.Fig.3B). Interestingly, *B.theta* CFU in the mesenteric  
64 lymph nodes were later reduced in all mice, with almost all SPF mice showing no counts in  
65 mLN at 72 hours post-inoculation (Suppl.Fig.3B).

66 In order to modulate the antigenic load in the gut, we generated a *B.theta* strain deleted for the  
67 BT4295 locus that encodes the epitope recognized by BΘOM T cells (KO strain). By mixing  
68 the wildtype (WT) and KO strains, we can control the abundance of cognate antigen, relatively  
69 independently of the total *B.theta* population density. We therefore orally inoculated GF mice  
70 with a ratio of 1:10 between the *B.theta* WT and KO strains (Low WT, Fig.1F). This resulted in  
71 a more than a 10-fold decrease in the abundance of the BΘOM T cell epitope carrying strain  
72 (Low WT) compared to monocolonized GF mice (Fig.1G). Surprisingly, although we still  
73 observed a high percentage of BΘOM T cells that divide and are activated in the Low WT  
74 group as compared to mock-colonized or KO-*B.theta*-monocolonized mice, this lower antigen  
75 dose fails to support T cell expansion suggesting that T cells are dividing but fail to survive  
76 (Fig.1H). Similarly, we increased WT *B.theta* luminal load in SPF mice by depleting the  
77 microbiota with broad-spectrum antibiotics before *B.theta* colonization (Fig.1I), obtaining

78 *B.theta* gut loads almost 100-fold higher than in non-pre-treated SPF mice (Fig.1J).  
79 Nevertheless, despite the clear increase on B $\theta$ OM T cell division in the mice colonized with  
80 *B.theta* WT compared to the KO strain; transient microbiota depletion was not sufficient to  
81 support B $\theta$ OM T cell expansion (Fig.1K).

82 In conclusion, *B.theta* colonization can induce B $\theta$ OM T cell division and expansion of T cell  
83 numbers only at high bacterial antigen loads in GF mice. Titrating the antigenic load in the gut  
84 lumen of both GF and SPF mice generates expected changes in the observed level of B $\theta$ OM  
85 T cell division, but with unexpected effects on B $\theta$ OM T cell expansion, suggesting that  
86 suboptimal stimulation fails to generate sufficient survival signals for dividing T cells. This data  
87 also indicates that antigen load alone fails to explain the observed difference in T cell  
88 proliferation between SPF and GF mice.

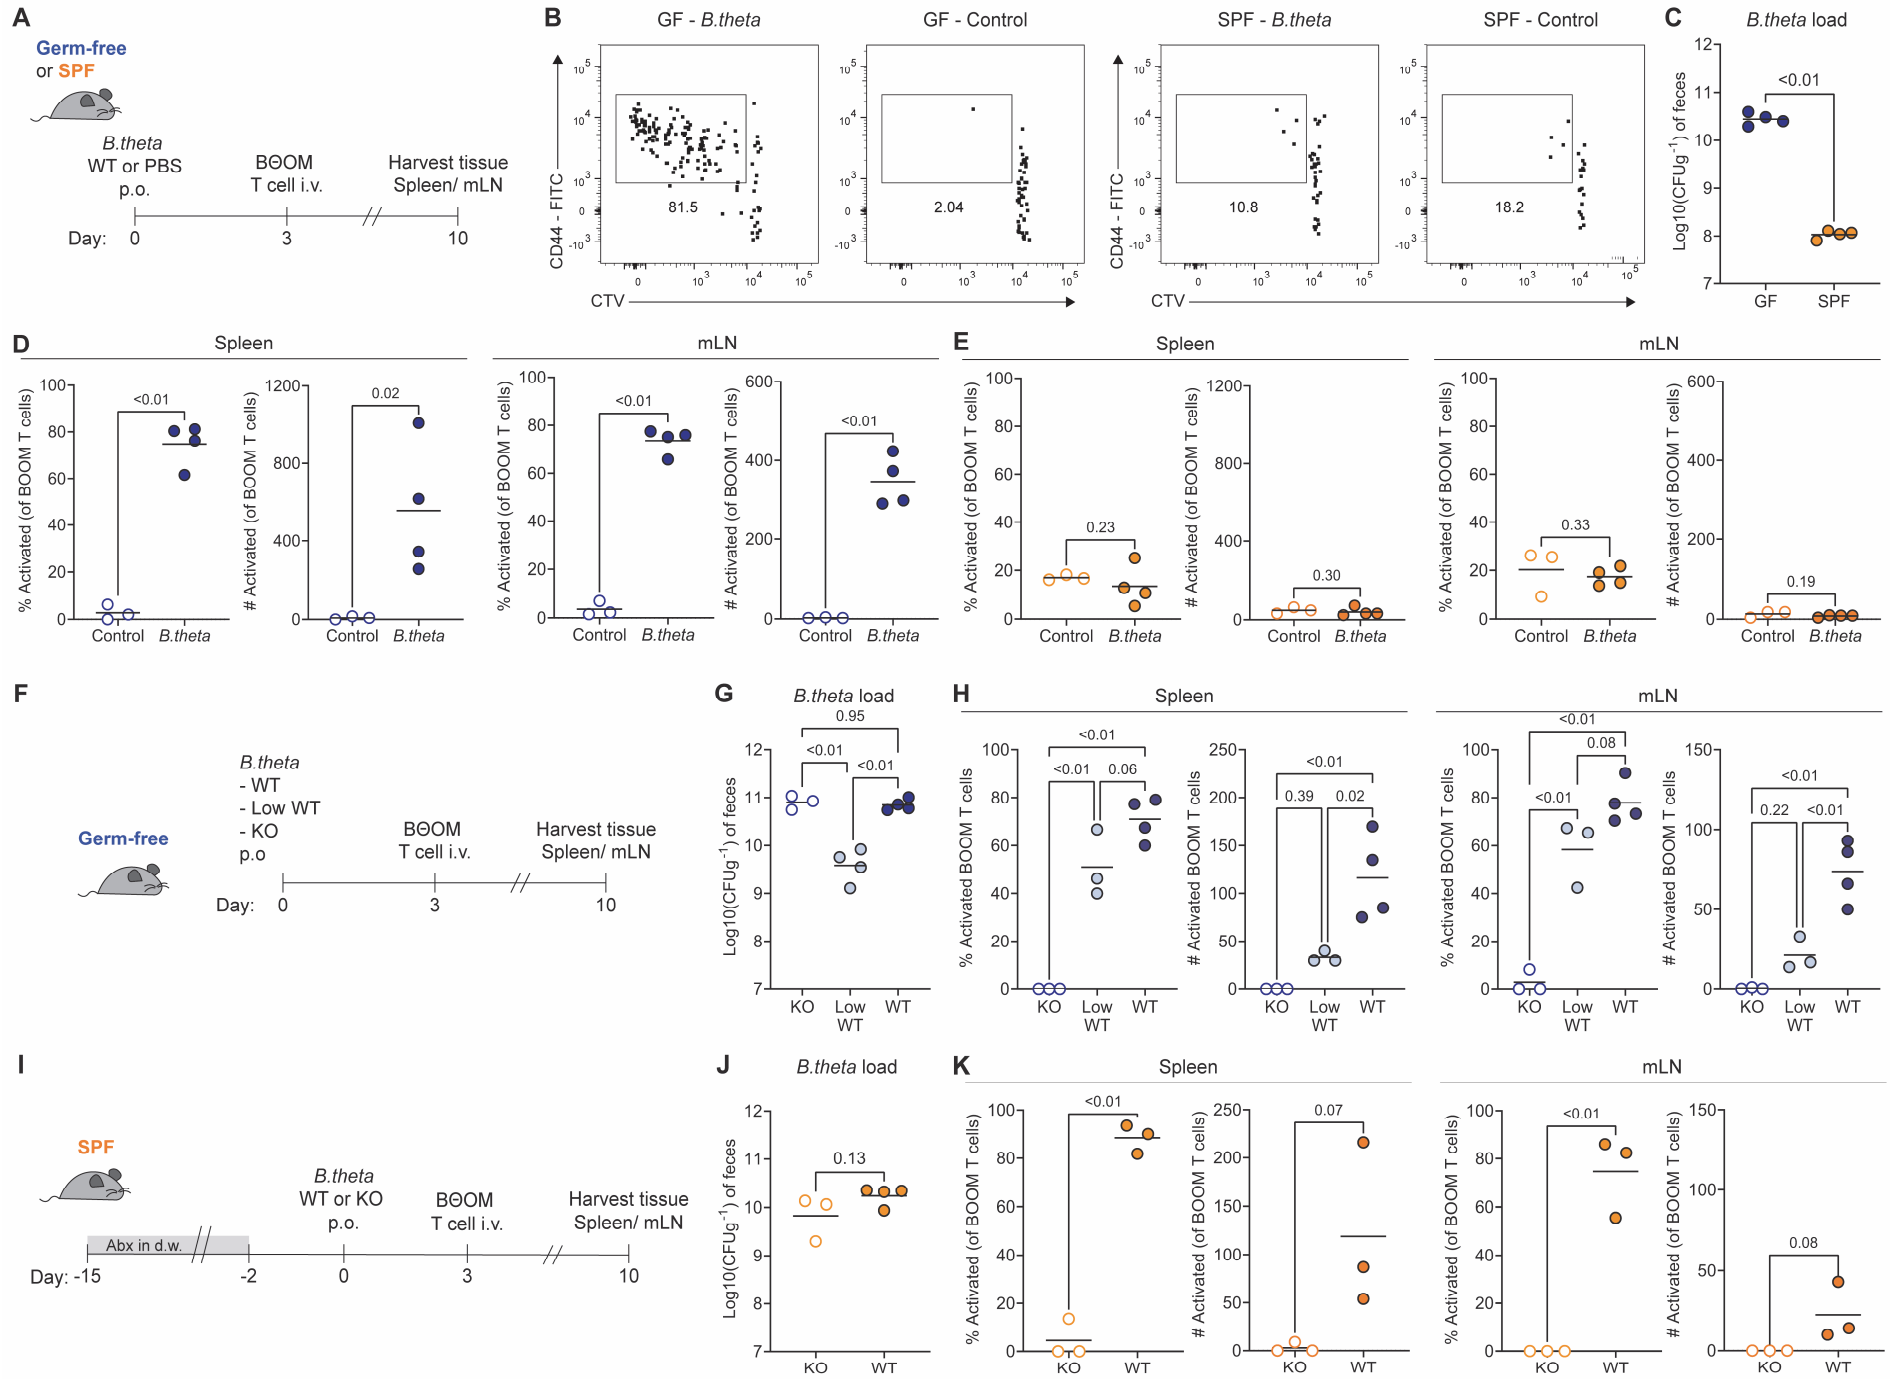

**Figure 1. B $\theta$ OM T cell proliferation is restricted in colonized mice.** (A) Experimental set-up of *B.theta* colonization (or PBS control) and adoptive transfer of B $\theta$ OM T cells into GF or SPF C57BL/6J mice. (B) Representative flow cytometry plots of activated (CD44<sup>hi</sup> CTV<sup>low</sup>) of B $\theta$ OM T cells in GF and SPF mice. (C) *B.theta* gut luminal load in GF and SPF mice at the time of B $\theta$ OM T adoptive transfer. (D-E) Percentage and number of activated B $\theta$ OM T cells in spleen and mLN in (D) GF and (E) SPF mice. (F) Experimental set-up of *B.theta* colonization in GF mice with different loads of wild-type *B.theta* strain (WT: all wild-type bacteria; Low WT: one wild-type bacteria per 10 KO bacteria; KO: all KO bacteria). (G) Gut luminal load of *B.theta* strains in GF mice at the time of B $\theta$ OM T adoptive transfer. (H) Percentage and number of activated B $\theta$ OM T cells in spleen and mLN. (I) Experimental set-up of *B.theta* colonization after broad-spectrum antibiotic treatment. SPF mice were colonized with either wild-type *B.theta* or a mutant strain lacking the BT4295 antigen (KO). (J) Gut luminal load of *B.theta* strains in antibiotic-treated SPF mice at the time of B $\theta$ OM T adoptive transfer. (K) Percentage and number of activated B $\theta$ OM T cells in spleen and mLN.



89 ***Gut pre-colonization increased the threshold for B $\Theta$ OM T cell activation in***  
90 ***immunocompetent mice***

91 Another contributor to the difference in B $\Theta$ OM T cell activation in GF and SPF mice could be  
92 that previous intestinal bacterial exposure alters the gut microenvironment to increase the  
93 threshold for T cell activation against new incoming bacteria. To test this idea, we pre-colonized  
94 GF mice using the *B.theta* KO strain together with the commensal *Eubacterium rectale* ATCC  
95 33656 (*E.rectale*) and *E.coli* HS. Six days post initial colonization, the *B.theta* KO strain was  
96 replaced by an erythromycin-resistant *B.theta* WT strain by short-term supplementation of  
97 erythromycin into the drinking water (Col+WT group, Fig.2A). We included as controls a pre-  
98 colonized group of mice without *B.theta* KO (Col+KO group), and another group colonized only  
99 with *B.theta* WT as described before (WT group, Fig.1A). At the day of adoptive transfer, all  
100 groups colonized with *B.theta* WT strain had similar bacterial loads in the feces (Fig.2B).

101 Pre-colonization of GF mice with a simple microbial community significantly reduced the  
102 percentage and number of activated B $\Theta$ OM T cells induced by *B.theta* WT in both spleen and  
103 mLN (Fig.2C). In fact, total numbers of activated B $\Theta$ OM T cells in the pre-colonized group were  
104 undistinguishable from the control carrying the *B.theta* KO strain (Fig.2C). Interestingly, in both  
105 groups colonized with *B.theta* WT, we observed that approximately 40 to 60% of activated  
106 B $\Theta$ OM T cells became Tregs in spleen and mLN (Suppl.Fig.4A).

107 As competition between lymphocytes plays a major role in regulating bacteria-host interactions  
108 in the gut [3]; we tested whether the absence of the adaptive immune system in *Rag1*<sup>-/-</sup> mice,  
109 influenced how pre-colonization affected activation of B $\Theta$ OM T cells in the gut. We pre-  
110 colonized GF *Rag1*<sup>-/-</sup> mice with a 3-species microbiota as described above (Fig.2A) and  
111 observed similar *B.theta* loads as in WT GF mouse colonization at the day of adoptive transfer  
112 (Fig.2D). Contrary to what we observed in WT mice, pre-colonization did not reduce the  
113 activation of B $\Theta$ OM T cells induced by *B.theta* WT colonization (Fig.2E) and most of activated  
114 B $\Theta$ OM T cells did not acquire a regulatory phenotype (Suppl.Fig.4B) in *Rag1*<sup>-/-</sup> mice.

115 We also tested effect of immunodeficiencies in *bona fide* SPF colonized mice (Fig.2F), in which  
116 gut *B.theta* loads are more restricted (Fig.2G). Although we observed a tendency towards  
117 higher proliferation of B $\Theta$ OM T cells in *Rag1*<sup>-/-</sup> SPF mice colonized with *B.theta* WT compared  
118 to the control KO strain, there was no major increase in the cell numbers as observed in GF  
119 *Rag1*<sup>-/-</sup> mice (Fig.2H) and T cells did not acquire a regulatory phenotype (Suppl.Fig.4C).  
120 However, it should be pointed out that the interpretation of these data is complicated by  
121 potential cross-reactivity of B $\Theta$ OM T cells to epitopes in the endogenous SPF microbiota.  
122 Finally, we probed the effect of acute depletion of Tregs on *B.theta*-specific T cell activation in  
123 fully colonized conditions using DEREG SPF mice (Suppl.Fig.5A). After depletion of host Tregs  
124 (Suppl.Fig.5B), B $\Theta$ OM T cells were activated regardless of the *B.theta* strain used for

125 colonization (Suppl.Fig.5C), indicating antigen-independent proliferation or activation by other  
126 cross-reactive microbiota members.

127 In summary, despite comparable *B.theta* antigen load in the gut, there is a differential impact  
128 on B $\theta$ OM T cell proliferation depending on the integrity of the gut immune system. In the  
129 absence of endogenous T and B cells, pre-exposure to gut microbes no longer prevents  
130 specific T cell activation, indicating an important role for other lymphocytes in controlling the  
131 threshold for intestinal T cell activation. However, Treg depletion resulted in strong antigen-  
132 independent T cell proliferation suggesting that Treg activity alone is not sufficient to explain  
133 this observation.

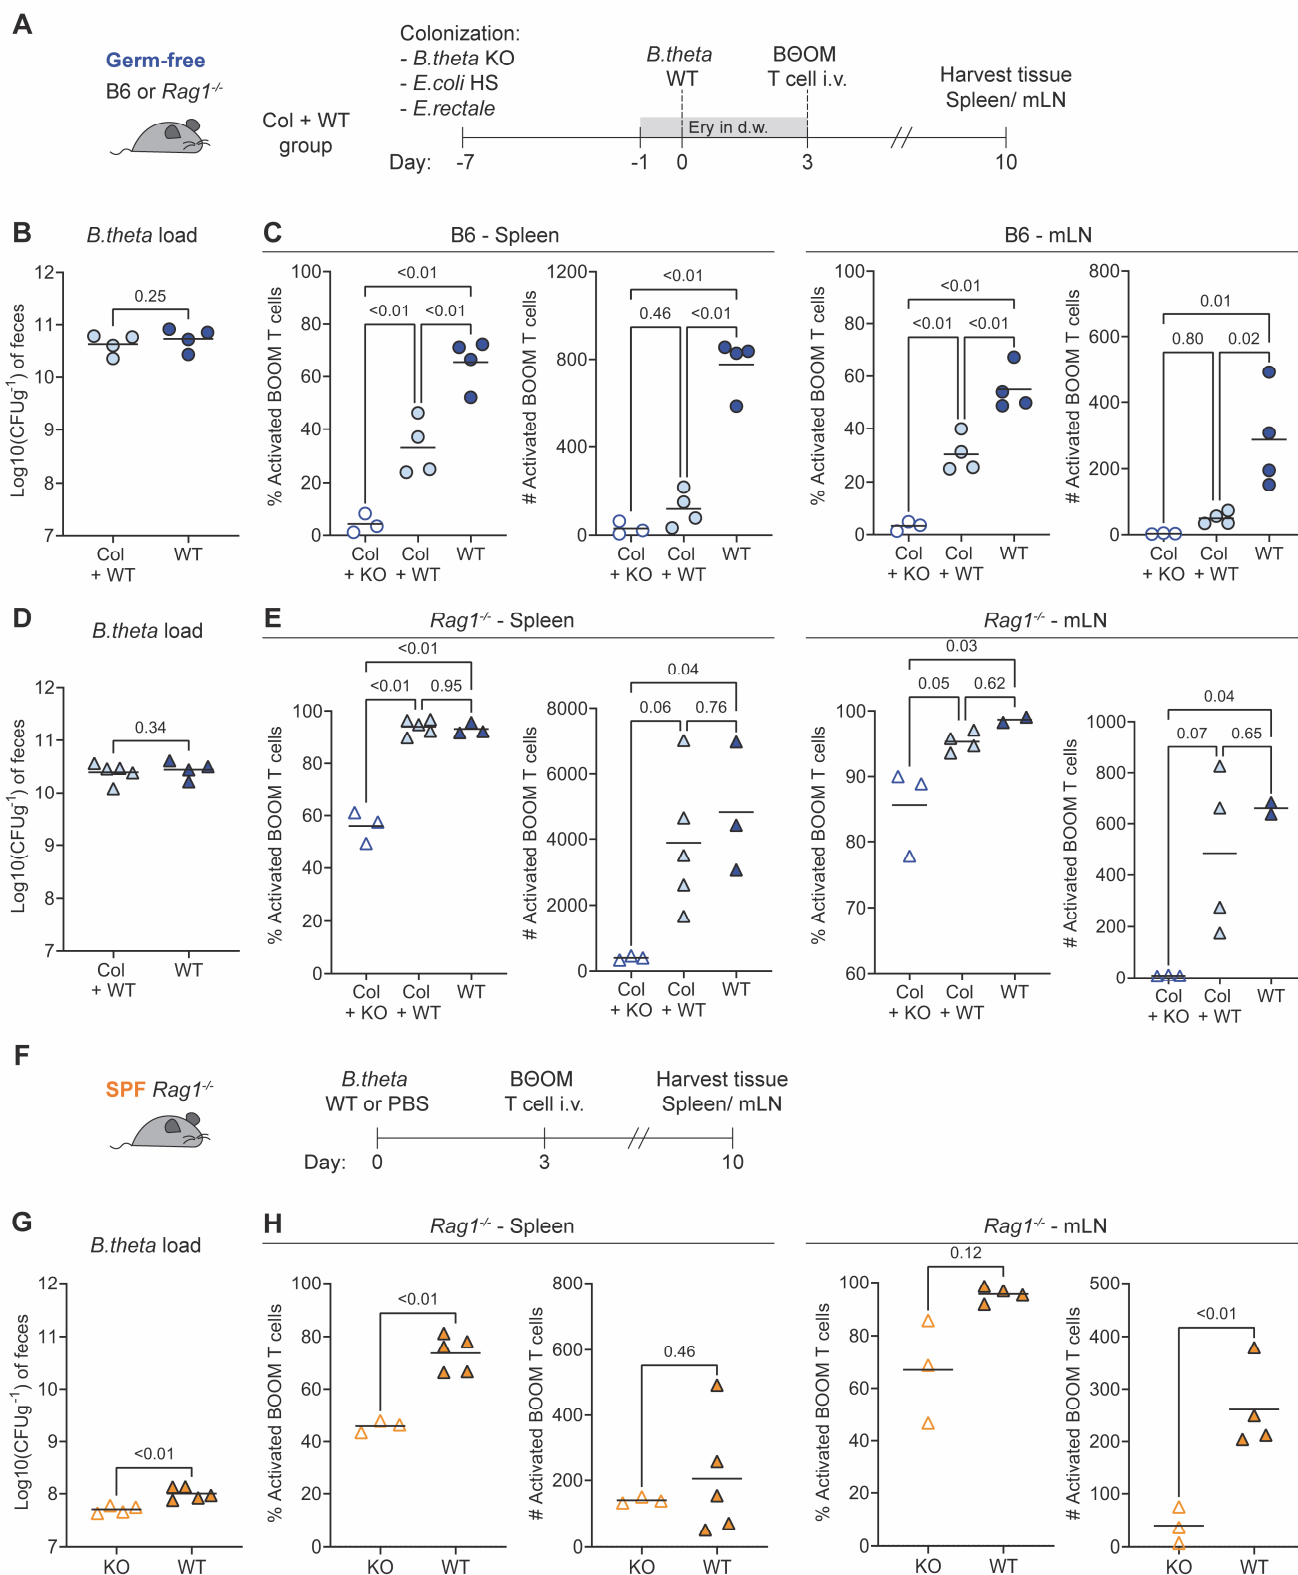

**Figure 2. Gut colonization does not restrict BΘOM T cell activation in immunodeficient mice. (A)** Experimental set-up of pre-colonization of GF wild-type (B6, circles) and immunodeficient (*Rag1*<sup>-/-</sup>, triangles) mice. Mice were initially colonized with *E.rectale*, *E.coli* HS and *B.theta* KO strains. One week after, mice received erythromycin in the drinking water and were colonized with an erythromycin-resistant *B.theta* strain (Col+WT). As controls, one group was kept undisturbed after the initial colonization till adoptive transfer (Col+KO) and another group was colonized only with *B.theta* WT as described before (WT, Fig.1A). **(B and D)** Gut luminal load of *B.theta* strains at the time of BΘOM T adoptive transfer in GF **(B)** B6 and **(D)** *Rag1*<sup>-/-</sup> mice. **(C and E)** Percentage and number of activated BΘOM T cells in spleen and mLN in GF **(C)** B6 and **(E)** *Rag1*<sup>-/-</sup> mice. **(F)** Experimental set-up of *B.theta* colonization in SPF *Rag1*<sup>-/-</sup> mice. **(G)** Gut luminal load of *B.theta* strains at the time of BΘOM T adoptive transfer **(H)** Percentage and number of activated BΘOM T cells in spleen and mLN.

134 ***T cell activation by gut bacteria depends on the TCR-transgenic model (480 words)***

135 TCR transgenic models are well known to show TCR-specific biases in experimental outcome.  
136 We therefore sought to confirm our observations in a second TCR transgenic system. To  
137 achieve this, we designed a plasmid that allows for surface display of an inserted peptide  
138 sequence in the non-pathogenic *E.coli* BL21 strain. We generated two different plasmids to  
139 allow for display of the B $\theta$ OM T cell Ag (BT4295<sub>541-554</sub>, *E.coli*-BT425) or the SMARTA-1 T cell  
140 (SM-1) Ag (GP<sub>64-80</sub> from lymphocytic choriomeningitis virus (LCMV), *E.coli*-GP64)  
141 (Suppl.Fig.6A). Both *E.coli* strains expressed similar levels of surface epitopes (Suppl.Fig.6B)  
142 and when administered systemically (Suppl.Fig.7A) were able to activate B $\theta$ OM  
143 (Suppl.Fig.7B) and SM-1 T cells (Suppl.Fig.7C).

144 We then tested the capacity of these strains to activate B $\theta$ OM and SM-1 T cells during gut  
145 colonization. After inoculating GF B6 or *Rag1*<sup>-/-</sup> mice with either *E.coli*-BT425 or *E.coli*-GP64,  
146 we transferred B $\theta$ OM and SM-1 labelled T cells at a 1:1 ratio (Fig.3A and Suppl.Fig.8).  
147 Bacterial loads of both *E.coli*-BT4295 and *E.coli*-GP64 were similar in both B6 (Suppl.Fig.9A)  
148 and *Rag1*<sup>-/-</sup> mice (Suppl.Fig.9B); although around 100-fold lower than the usual *B.theta* CFU  
149 density in GF mice (Suppl.Fig.3A).

150 Despite the lower CFU densities, B $\theta$ OM T cells proliferated in *E.coli*-BT4295 colonized B6  
151 mice (Fig.3B), reaching similar levels of activated T cells (Fig.3C) and Tregs (Suppl.Fig.9B) as  
152 those observed during WT *B.theta* colonization (Fig.2B, Suppl.Fig.4B). B $\theta$ OM T cell  
153 proliferation was more noticeable in GF *Rag1*<sup>-/-</sup> mice. We found a massive expansion in the  
154 total number of B $\theta$ OM T cells in *E.coli*-BT4295 colonized ex-GF *Rag1*<sup>-/-</sup> mice (Fig.3D), which  
155 was 4-10 times more than the one observed during *B.theta* colonization (Fig.2C). As previously  
156 observed during *B.theta* colonization (Suppl.Fig.4D), almost no B $\theta$ OM T cells acquired a  
157 regulatory phenotype in *E.coli*-BT4295 colonized ex-GF *Rag1*<sup>-/-</sup> mice (Suppl.Fig.9C).

158 On the other hand, SM-1 T cells in GF B6 mice colonized with the corresponding *E.coli*-GP64  
159 strain did not expand (Fig.3B). Although there was cell division (Fig.3E), there was no  
160 comparable increase in cell numbers (Fig.3E). In the case of GF *Rag1*<sup>-/-</sup> mice colonization with  
161 *E.coli*-GP64, SM-1 showed antigen-specific expansion with almost no homeostatic  
162 proliferation in control *E.coli*-BT4295 colonized mice (Fig.3F). Interestingly, the few activated  
163 SM-1 T cells differentiated into Tregs in a similar proportion as activated B $\theta$ OM T cells  
164 (Suppl.Fig.9D and Suppl.Fig.9E). Based on this data, either antigen presentation of the SM-1  
165 peptide epitope or activation of SM-1 cells in the gut is dramatically less efficient than B $\theta$ OM  
166 T cells.

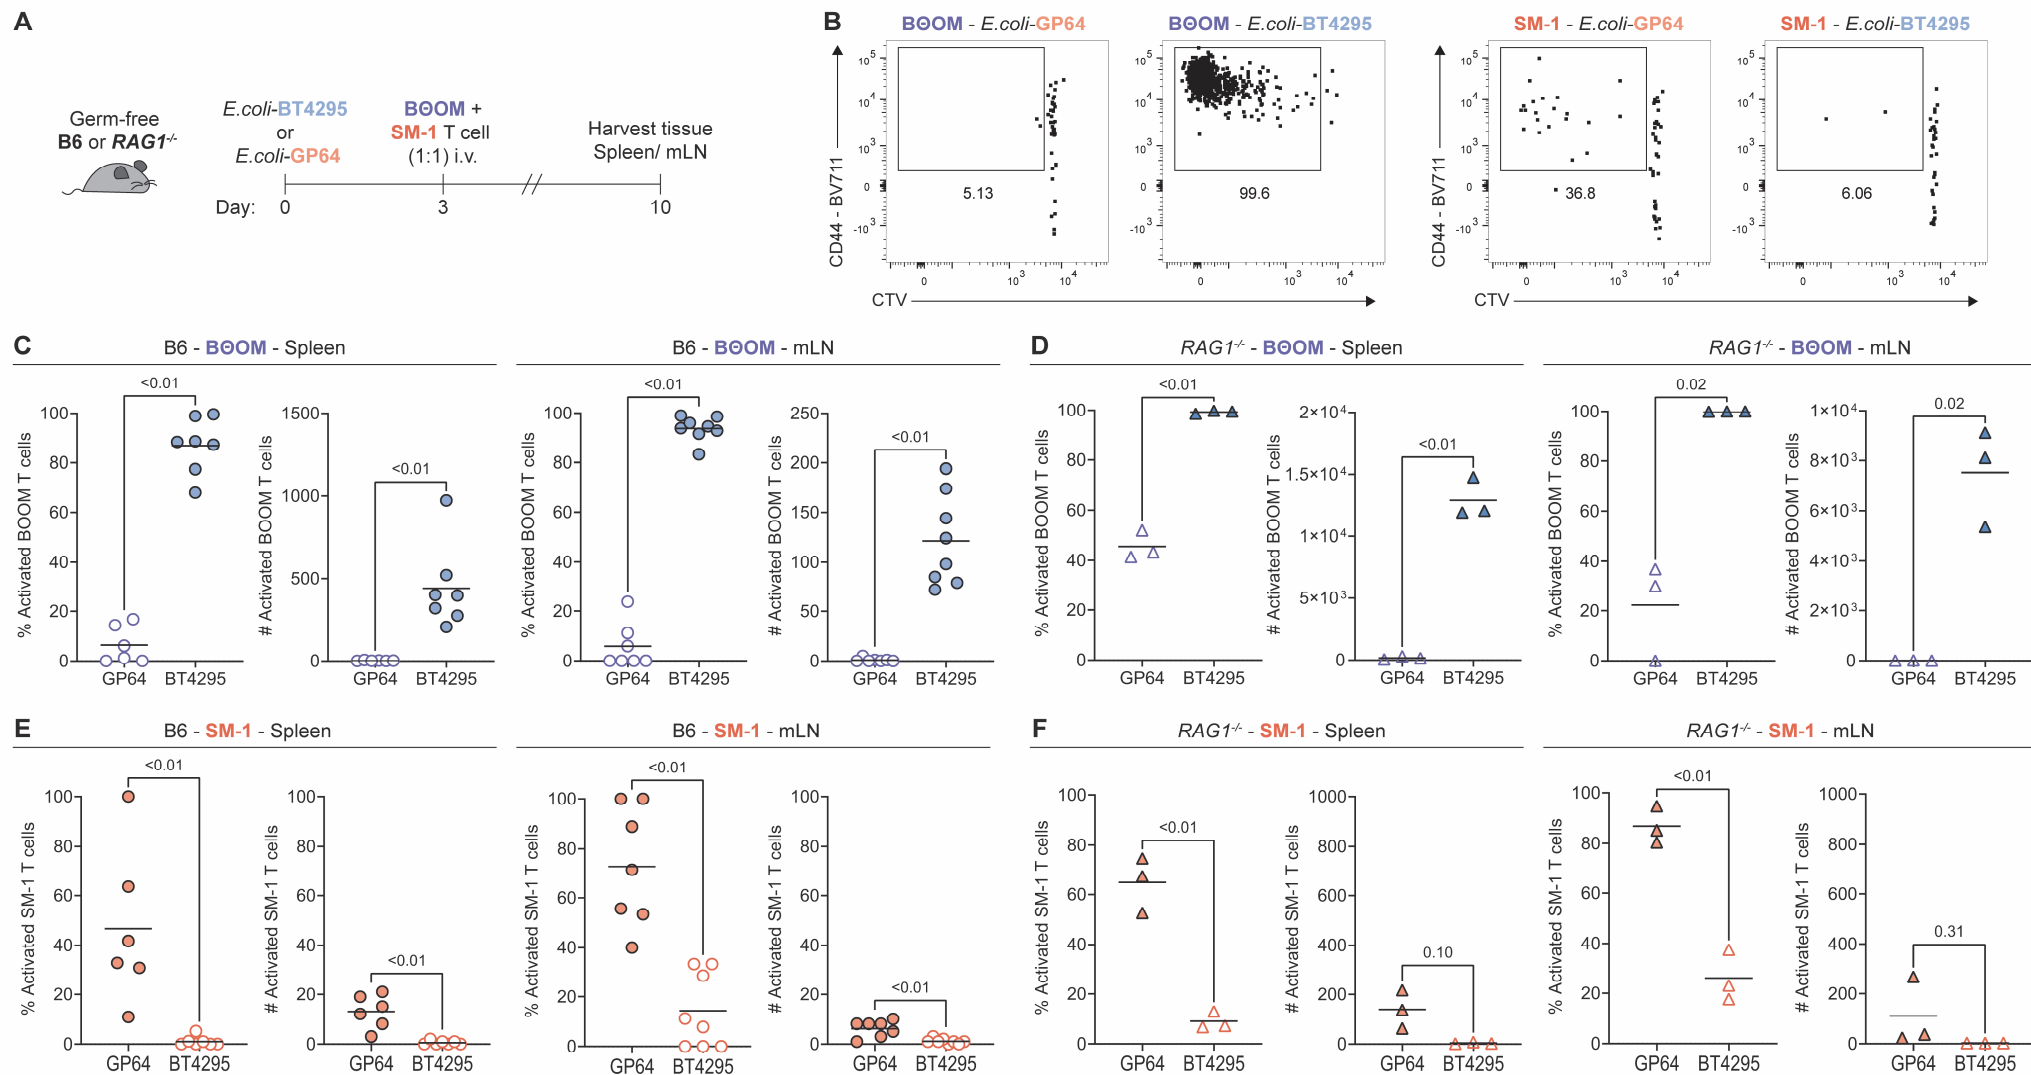

**Figure 3. B6OM and SM-1 T cell proliferate differently to gut colonization with antigen-expressing bacteria. (A)** Experimental set-up of C57BL/6J (B6) or *Rag1*<sup>-/-</sup> GF mice colonization with antigen-expressing *E. coli* BL21. Strains carry a plasmid for surface display of either the *B. theta* BT4295<sub>541-554</sub> (*E. coli*-BT4295) or the LCMV GP<sub>64-80</sub> (*E. coli*-GP64) epitope. B6OM T cells and SM-1 T cells were adoptively transferred in a 1:1 ratio. **(B)** Representative flow cytometry plot of activated B6OM and SM-1 T cells. **(C and D)** Percentage and number of activated B6OM T cells in spleen and mLN in GF **(C)** B6 and **(D)** *Rag1*<sup>-/-</sup> mice. **(E and F)** Percentage and number of activated SM-1 T cells in spleen and mLN in GF **(E)** B6 and **(F)** *Rag1*<sup>-/-</sup> mice.

## 167 DISCUSSION

168 Bacterial antigens are constantly interacting with the immune system in the gut, and many of  
169 the adaptive immune cells in the gut are microbiota specific during homeostasis[11],[12]. We  
170 explored some fundamental aspects of this interaction by studying the role of gut colonization  
171 and bacterial load in regulating the activation threshold for T cells in the gut.

172 B $\theta$ OM T cell were activated and proliferated in ex-GF B6 mice after colonization with *B.theta*,  
173 similarly to previously reported with antibiotic-treated SPF *Rag1*<sup>-/-</sup> mice[10]. However, we  
174 observed that SPF B6 mice restricted B $\theta$ OM T cell proliferation after colonization with *B.theta*.  
175 It should be noted that *B.theta* can establish in the gut of our SPF mice in a stable fashion[13].  
176 Also, this restriction does not seem to be mediated by an intrinsic difference in the immune  
177 system of GF and SPF mice as adoptively transferred B $\theta$ OM T cells respond similarly to a  
178 systemic challenge with inactivated bacteria in both environments. Similarly, *B.theta* sampling  
179 into the mLNs appeared to be independent on the colonization state at early time-points and  
180 showed similar loads as other non-invasive commensal bacteria[14],[15].

181 One potential mechanism that restricts B $\theta$ OM T cell activation is the bacterial antigen load in  
182 the gut, which is determined by the luminal bacterial density and the antigen expression per  
183 bacterial cell. In the case of *B.theta*, high bacterial density is required to induce B $\theta$ OM T cell  
184 proliferation in GF mice. Although lower densities of *B.theta* failed to induce substantial  
185 proliferation in GF mice, this can be related to the level of antigen expression per cell. Reducing  
186 gut bacterial density by diluting the antigen-expressing *B.theta* with the KO strain, which  
187 competes for a very similar niche in the gut, diminishes the number of antigen-producing  
188 bacteria that are sampled into the mLN during the initial hours post-colonization (1-10 bacteria  
189 instead of 1000). Interestingly, *E.coli* expressing the BT4295 peptide was equally stimulatory  
190 to B $\theta$ OM T cells in GF mice despite colonizing to around a 100-fold lower level. This could be  
191 due to over-expression of the antigen compared to endogenous levels in *B.theta*, more efficient  
192 antigen processing than the endogenous *B.theta* protein, or increased adjuvanticity of the  
193 *E.coli* presenting the antigen.

194 In the case of SPF mice, when antibiotic pre-treatment was used to colonize *B.theta* to levels  
195 close to those observed in GF mice, we could measure a small amount of B $\theta$ OM T cell  
196 activation. However, T cell proliferation and expansion remained very limited, which indicates  
197 mechanisms operating above and beyond the gut antigen load. We hypothesized therefore  
198 that B $\theta$ OM T cell activation and proliferation could be restricted in SPF mice by the immune  
199 modulation imprinted by their microbiota. Indeed, bacterial colonization in GF mice, either by  
200 a single strain[16] or a consortium[17], can modify responsiveness of the gut immune system.  
201 In addition, it has been shown that microbiota regulation of innate immunity can affect the

202 proliferative capacity of transferred T cells[18]. Consistent with this, pre-colonizing mice with a  
203 very simple community, which includes representatives of the main gut phyla, damped the  
204 activation and proliferation levels of B $\theta$ OM T cell. However, the mechanism behind this  
205 regulation seems to be related to a functional adaptive immune system, as no such  
206 downregulation was observed in *Rag1*<sup>-/-</sup> animals. Depletion of Tregs induced an entirely  
207 different phenomena, also suggesting that the regulation may be based on cell-cell competition  
208 rather than insufficient Treg activity per-se in GF mice. Therefore, it seems that after initial  
209 colonization by bacteria, the adaptive immune system sets the microenvironment of the gut to  
210 a higher threshold for activation, preventing newly-incoming from bacteria inducing major  
211 activation and proliferation of T cells.

212 Finally, there are some limitations in the use of TCR-Tg cells for studying antigen specific  
213 responses. Different TCR-Tg T cells potentially behave different under similar antigen  
214 exposure based on their antigenic affinity or the surrounding microenvironment. For example,  
215 *Akkermansia*-specific TCR-Tg T cells are able to proliferate in colonized mice, both gnotobiotic  
216 and SPF[19]. Compared to B $\theta$ OM T cells, we observed a much weaker activation of SM-1 T  
217 cells, with almost no proliferation in monocolonized B6 mice and only a very limited expansion  
218 in *Rag1*<sup>-/-</sup>. This limited expansion of TCR-Tg T cells has been reported in a similar model using  
219 *E.coli* for antigen delivery, even under barrier disrupting conditions such DSS  
220 treatment[20],[21]. Assuming that antigenic exposure in the gut is similar, we should ponder  
221 other potential mechanisms by which we and others found this restricted proliferation of SM-1  
222 T cells. For example, we found that SM-1 have an approx. 200 times higher affinity (EC<sub>50</sub>  
223 ~5nM,[22]) towards their cognate peptide than B $\theta$ OM T cells (Suppl.Fig.10). Therefore there  
224 is no simple linear relationship between T cell activation and affinity. However, we cannot  
225 exclude that this plays a role, for example via stronger interactions with tolerance mechanisms  
226 such as clonal deletion[23]–[25]. CBir1, another microbiota-specific TCR-Tg T cells, are also  
227 unable to proliferate in the gut of immunocompetent B6 mice[26], as they are deleted in an  
228 antigen-dependent manner upon activation[27]. Exploring the basic mechanisms that influence  
229 why different TCR-expressing cells undergo clonal deletion or phenotypic differentiation in the  
230 gut and their similarities to affinity-based selection in the thymus will be an exciting topic of  
231 future studies.

232 In summary, we found that the activation threshold of gut T cells towards incoming bacteria is  
233 strongly influenced by pre-exposure to bacteria in a manner dependent on an intact adaptive  
234 immune system. High antigen loads, and the immunostimulatory nature of the antigen-  
235 expressing bacteria contribute to generating robust T cell activation in bacteria-naïve mice, but  
236 fail to induce strong T cell proliferation of BOOM T cells in pre-colonized gnotobiotic or fully  
237 colonized mice.

## 238 **ACKNOWLEDGEMENTS**

239 We would like to thank Prof. Paul Allen for kindly sharing the BΘOM TCR-Tg mouse line with  
240 us. We would also like to express our gratitude Dr. Roman Spörri and Prof. Annette Oxenius  
241 for providing SMARTA-1 TCR-Tg mice, experimental reagents and for providing a discussion  
242 environment for this project in their group meetings. Prof. Eric Martens kindly supplied the  
243 parental *B.theta* strain and the pNBU2 plasmid carrying a tetracyclin resistant cassette (TetQ).  
244 Finally, we thank Prof. Carolyn King, Dr. Daniela Latorre, Dr. Ilaria Spadafora, Dr. Ioana Sandu  
245 and Verena Lentsch for enjoyable discussions and the interesting ideas about this project.

## 246 **Funding**

247 This work was funded by Swiss National Science Foundation (40B2-0\_180953,  
248 310030\_185128) (E.S.), European Research Council Consolidator Grant (NUMBER 865730-  
249 SNUGly) (E.S.). Work in the Joller lab was supported by an ERC Starting Grant (677200 –  
250 Immune Regulation). The funders had no role in study design, data collection and analysis,  
251 decision to publish, or preparation of the manuscript.

## 252 **Author Contributions**

253 Conceptualization, D.H., and E.S.; Methodology, D.H., A.E., T.K., N.J. and E.S.; Formal  
254 Analysis, D.H.; Investigation, D.H., B.C., A.E., S.B., E.F., C.M.; Resources, T.K., N.J., and  
255 E.S.; Writing – Original draft, D.H. and E.S.; Writing – Review and Editing D.H., B.C., A.E.,  
256 S.B., E.F., C.M., T.K., N.J. and E.S.; Visualization, D.H., and E.S.; Supervision, T.K., N.J. and  
257 E.S.; Funding acquisition, N.J. and E.S.

## 258 **Declaration of Interest**

259 The authors declare no competing interests.



## 260 **METHODS**

### 261 *Mice*

262 GF B6 mice are bred and maintained in open-top cages within flexible-film isolators, supplied  
263 with HEPA filter air, and autoclaved food and water. GF status of these colonies is monthly  
264 assessed via anaerobic and aerobic liquid cultures. SPF B6 mice are bred and maintained in  
265 IVC cages in a clean mouse facility. All mice used in the experiments were adults between 12-  
266 18 weeks old, males and females. *Rag1*<sup>-/-</sup> mice [28] were rederived under GF conditions. *Rag1*<sup>-/-</sup>  
267 <sup>-/-</sup> mice GF and SPF mice were kept under conditions as described before at the ETH  
268 Phenomics Center (EPIC). DEREK mice [29] were kept under SPF conditions and experiment  
269 were performed at the Laboratory Animal Services Center (LASC) at the University of Zürich.

270 Sperm from a B00M CD45.1<sup>+/+</sup> *Rag1*<sup>-/-</sup> transgenic mouse line was rederived at EPIC [10].  
271 B00M CD45.1<sup>+/-</sup> *Rag1*<sup>-/-</sup> transgenic mice are kept in a clean mouse facility under enhanced  
272 SPF conditions. SMARTA (SM-1) CD45.1 <sup>+/-</sup> transgenic mice are bred and maintain under  
273 similar conditions[30]. All experiments were conducted in accordance with the ethical approval  
274 of the Zürich Cantonal Authority under the license ZH120/19.

### 275 *Bacterial strains*

276 All *Bacteroides thetaiotaomicron* (*B.theta*) strains were produced by using *Δtdk* VPI-5842  
277 strain as background (*B.theta* WT strain). The KO strain (*BT4295* gene deletion) was produced  
278 via counterselectable allelic exchange as described before [31]. Briefly, a *Δtdk* strain  
279 conjugated with the pExchange-tdk-ermG vector, carrying the 1Kb flanking homologous  
280 regions of the *BT4295* gen. After initial homologous recombination, clones underwent  
281 selection in brain-heart infusion (BHI) agar plates supplemented with of 10% sheep blood (BHI-  
282 blood) plates with erythromycin (25 µg/ml) plus gentamycin (200 µg/ml). Isolated clones were  
283 counterselected in BHI-blood plates with 5-fluoro-2'-deoxyuridine (200 µg/ml) which forces a  
284 second homologous recombination. Selected clones were screened by PCR and *BT4295*  
285 deletion was confirmed by sequencing.

286 In both strains, *B.theta* WT and KO, we introduced a short-genetic tag, a fluorescent protein  
287 (GFP or mCherry) and antibiotic resistance (against erythromycin or tetracycline) by using the  
288 mobilizable *Bacteroides* element NBU2, which integrates into the *Bacteroides* genomes at a  
289 conserved location [32]. The suicide NBU2 plasmid carrying the described inserted genes was  
290 transferred to the target *B.theta* strains by conjugation with *E.coli* S17-1. *B.theta* strains that  
291 integrate the suicide NBU2 plasmid were selected in BHI-blood plates supplemented with  
292 gentamycin (200µg/ml) and either erythromycin (25µg/mL) or tetracycline (2µg/mL) depending  
293 on the antibiotic resistance transferred in the plasmid. After 48 hours, single colonies were

294 streaked in fresh BHI-blood agar plates with antibiotics, to avoid potential contamination with  
295 WT strains. Successful insertion in the BTt70 or BTt71 sites was evaluated by PCR.

296 For *E.coli* strains, constitutive expression of GP64 and BT4295 T-cell peptides on the surface  
297 was achieved by transformation with the plasmids pTK358 and pTK557, respectively, and  
298 maintenance in selective media. The plasmids consisted of a kanamycin resistance gene, an  
299 RSF1030 origin of replication, an expression cassette driven by the weak constitutive promoter  
300 J23114 [33], and an open reading frame encoding a PelB secretion signal, C-Myc-tag, the T  
301 cell peptide, followed by the neck, stalk and transmembrane domain (aa973-1098) of the  
302 trimeric autotransporter adhesin Hia from *H. influenzae* [34]. Surface display of the peptide  
303 was assessed by bacterial flow cytometry [35] using anti-Myc-AF647 (9B11) antibody.

#### 304 *Bacterial cultures*

305 *B.theta*, *Eubacterium rectale* ATCC 33656 (*E.rectale*) and *E.coli* HS strains were streaked from  
306 frozen stocks on brain-heart infusion (BHI) agar plates supplemented with of 10% sheep blood  
307 (BHI-blood agar) and grown anaerobically (5% H<sub>2</sub>, 10% CO<sub>2</sub>, rest N<sub>2</sub>) at 37°C for at least 48  
308 hours. Similarly plasmid carrying *E.coli* BL21 strains were streaked on LB plates supplemented  
309 with kanamycin (50µg/mL) and grown aerobically at 37°C overnight.

310 For the preparation of inoculums for colonization, several colonies were picked and grown  
311 anaerobically in standing cultures of brain-heart infusion supplemented media (BHIS: 37 g/L  
312 BHI (Sigma); 1 g/L-cysteine (Sigma); 1 mg/L Hemin (Sigma)) at 37°C for 12-18 hours. Liquid  
313 cultures were supplemented with either erythromycin (25 µg/mL) or tetracycline (2 µg/mL)  
314 depending on the antibiotic resistance inserted in the strain. In the case of plasmid carrying  
315 *E.coli* BL21 strains, single colonies were picked and grown aerobically, in shaking cultures of  
316 LB supplemented with kanamycin (50 µg/mL) at 37°C for 12-18h.

#### 317 *Bacterial inoculums for colonization*

318 For colonization experiments in GF, gnotobiotic and SPF mice, we used strains described on  
319 the specific figures. For all colonization experiments, all cultures were spun down (3000rcf for  
320 20min at 10°C) and washed once with cold PBS buffer to eliminate any antibiotic from the cell  
321 suspension. Bacterial density was quantified via optical density (1 O.D. ~ 4x10<sup>8</sup> bacteria/mL)  
322 and bacterial numbers were adjusted to approximately 10<sup>8</sup> bacteria/mL. Usual dose of  
323 colonization for all experiments was approximately 10<sup>7</sup> bacteria, unless otherwise specified in  
324 the experimental setting, delivered by gavaging 100 µL.

325 For experiments in Fig.1 comparing different ratios of erythromycin-resistant WT and  
326 tetracyclin-resistant KO *B.theta* strains, we kept the control *B.theta* KO strain in 10<sup>7</sup> bacteria  
327 per inoculum and added 10<sup>5</sup> of *B.theta* WT to the inoculum. For experiments in Fig.2 assessing  
328 the effects of pre-colonization, *B.theta* KO, *E.rectale* and *E.coli* HS were grown in individual

329 liquid cultures as described before. While in the anaerobic tent, cultures were mixed in a 1:1  
330 ratio depending on the experimental group (*B.theta* KO + *E.rectale* + *E.coli* HS or *E.rectale* +  
331 *E.coli* HS) and sealed in a sterile and anaerobic serum bottle. Cultures were under anaerobic  
332 conditions until some minutes before being gavaged.

### 333 *Bacterial load quantification*

334 Colonization status and bacterial loads of all strains were assessed by culture in agar plates.  
335 Fecal pellets, cecal content or mesenteric lymph nodes (mLN) were sampled at the designated  
336 timepoints and weighed (except mLN). All samples were homogenized in PBS (1 mL for cecal  
337 content and 0.5 mL for fecal pellets and mLN) for 2.5 min at 25 Hz in a TissueLyser (Qiagen,  
338 Germany). In the case of mLN, 200  $\mu$ L of the homogenized tissue was plated on BHI-blood  
339 agar plates supplemented with erythromycin (25  $\mu$ g/mL). For fecal and cecum samples, a serial  
340 dilution was performed in PBS and 10  $\mu$ L of each dilution was plated as parallel lanes in agar  
341 plates. For experiments including *B.theta*, we plated the serial dilution of fecal or cecum  
342 samples in BHI-blood agar plates supplemented with either erythromycin (25  $\mu$ g/mL) or  
343 tetracycline (2  $\mu$ g/mL) depending of the strain used. Plates were incubated anaerobically at  
344 37°C for at least 48 hours. For experiments including *E.coli* strains, we plated the serial dilution  
345 of fecal samples in LB agar plates supplemented with kanamycin (50  $\mu$ g/mL), and then  
346 incubated aerobically at 37°C overnight. Colonization status and bacterial loads of *E.rectale*  
347 and *E.coli* HS strains were assessed by qPCR.

### 348 *Adoptive T cell transfers*

349 B $\alpha$ OM T cells were obtained from TCR-Tg $\pm$  CD45.1 $\pm$  *Rag1* $\pm$  mice. SMARTA-1 (SM-1) T  
350 cells were obtained from TCR-Tg $\pm$  CD45.1 $\pm$  *Rag1* $\pm$  mice. Donor mice matched the gender  
351 of the recipient mice whenever possible, otherwise female donors were used. Spleen was  
352 harvested and disintegrated into single suspension using a 40 $\mu$ m cell strainer (Falcon) and  
353 MACS buffer (PBS, 2% FBS, 5mM EDTA). After washing cells once (800 rcf, 5 min, 4°C), we  
354 positively selected CD4 $\pm$  T cells using CD4 MicroBeads and magnetic sorting (Miltenyi Biotec).  
355 Enriched CD4 $\pm$  T cells were counted, washed in PBS, adjusted to 2x10<sup>6</sup> cells/mL concentration  
356 in PBS and with 5 $\mu$ M of CellTrace™ Violet for 20min at 37°C in water bath. After quenching  
357 the reaction with 5 volumes MACS buffer, cells were washed again in PBS and adjusted to a  
358 concentration of 1x10<sup>6</sup> cells/mL. Mice were injected with 2x10<sup>5</sup> CTV-labelled T cells in a volume  
359 of 200  $\mu$ L via the tail vein.

### 360 *Acute regulatory T cell depletion*

361 DEREK and C57B6/L mice were injected with 200 ng of diphtheria toxin (DT, Merck) one day  
362 before adoptive T cell transfer, and one and three days afterwards. Total body mass was  
363 monitored pre-treatment and during the days of DT injection. Effect of DT on the depletion of  
364 regulatory T cells was confirmed at the end of the experiment by flow cytometry.

### 365 *Cell isolation from peripheral tissue*

366 Spleen and mLNs were harvested 7 days after adoptive T cell transfer. mLNs were digested  
367 with 1U/mL of Liberase TL (Roche) and 50U/mL of DNase I (Sigma-Aldrich) for 20 min at 37°C.  
368 Splens and digested mLNs were disintegrated using a 40µm cell strainer (Falcon) into single  
369 cell suspension in MACS buffer (PBS, 2% FBS, 5mM EDTA). After washing the cells once in  
370 MACS buffer, we lysed red blood cells using RBC Lysis Buffer for 5min at RT (BioLegend).  
371 RBC Lysis Buffer was quenched with MACS buffer and washed once. Then, we enriched for  
372 CD4<sup>+</sup> T cells by negative selection using biotinylated anti-CD8, anti-Ly-6G and anti-  
373 CD45R/B220 antibodies and MojoSort™ Streptavidin Nanobeads (BioLegend). In order to  
374 maximize cell recovery from spleen samples, we magnetically sorted the samples twice. After  
375 CD4 enrichment, cells were kept in ice until surface/intranuclear staining.

### 376 *Flow cytometry*

377 For cell surface marker staining, the cell pellet was re-suspended in 100 µL of antibodies and  
378 LIVE/DEAD™ Fixable Near-IR dye (ThermoFisher Scientific) diluted in MACS buffer, and  
379 stained on ice for 30min. After washing once with MACS buffer, cells were fixed, permeabilized  
380 and stained for intranuclear transcription factors using the eBioscience™ Foxp3/Transcription  
381 Factor Staining Buffer Set according to manufacturer indications (ThermoFisher Scientific). The  
382 following antibodies were used for surface and intranuclear staining: CD44-FITC (IM7,  
383 BioLegend), CD44-BV711 (IM7, BioLegend), TCR Vβ12-PE (MR11-1, BioLegend), TCR Vα2-  
384 PE/Cy7 (B20.1, BioLegend), CD45.2-PerCP (104, BioLegend), CD45.1-APC (A20,  
385 BioLegend), CD45.1-PE (A20, BioLegend), CD4-PE/Cy7 (RM4-5, BioLegend), CD4-PerCP  
386 (RM4-5, BioLegend), CD62L-FITC (MEL-14, BioLegend), CD62L-BV605 (MEL-14,  
387 BioLegend), Foxp3-FITC (FJK-16s, eBioscience), CD69-PE (H1.2F3, BioLegend).

### 388 *CD69 Activation Assay*

389 BT4295 peptide in powder form were dissolved in RPMI-1640 (Gibco) and serial dilutions of  
390 the peptide were plated so that a dose-response curve could be generated. BΘOM T cells  
391 were isolated from total splenocytes of *Rag1*<sup>-/-</sup> CD45.1/2 BΘOM; and splenocytes were isolated  
392 from CD45.2/2 C57BL/6 mice as described before. We plated 10000 CD45.1/2 BΘOM T cells  
393 and 50000 CD45.2/2 splenocytes per well in RPMI-1640 supplemented with 10% FCS, 2 mM  
394 L-glutamine, 1% penicillin-streptomycin mix (50K U Pen/50 mg Strep), 1 mM sodium pyruvate,  
395 0.1 nM non-essential amino acids, 20 mM HEPES and 50nM β-mercaptoethanol were added  
396 to the dilution series. Cells were incubated overnight at 37°C, and subsequently stained for  
397 CD69 surface expression.

### 398 *Statistics*

399 We evaluated differences between two groups using Welch t test to assume for unequal  
400 standard deviation. For comparisons between more than two groups we used analysis of

401 variance (ANOVA) with Tukey's multiple comparisons test. All statistical tests were performed  
402 using the GraphPad Prism 9 software. P values of less than 0.05 were considered to be  
403 significant. In all graphs, we plotted individual values and the group mean.

## REFERENCES

1. **Vandeputte D, Kathagen G, D'hoel K, Vieira-Silva S, Valles-Colomer M, Sabino J, Wang J, et al.** Quantitative microbiome profiling links gut community variation to microbial load. *Nature*. 2017; **551**:507–511.
2. **Jakobsson HE, Rodríguez-Piñero AM, Schütte A, Ermund A, Boysen P, Bemark M, Sommer F, et al.** The composition of the gut microbiota shapes the colon mucus barrier. *EMBO Rep*. 2015; **16**:164–177.
3. **Ansaldo E, Farley TK, Belkaid Y.** Control of Immunity by the Microbiota. *Annu. Rev. Immunol.* 2021; **39**:449–479.
4. **Atarashi K, Tanoue T, Oshima K, Suda W, Nagano Y, Nishikawa H, Fukuda S, et al.** Treg induction by a rationally selected mixture of Clostridia strains from the human microbiota. *Nature*. 2013; **500**:232–236.
5. **Yang Y, Torchinsky MB, Gobert M, Xiong H, Xu M, Linehan JL, Alonzo F, et al.** Focused specificity of intestinal TH17 cells towards commensal bacterial antigens. *Nature*. 2014; **510**:152–156.
6. **Britton GJ, Contijoch EJ, Spindler MP, Aggarwala V, Dogan B, Bongers G, Mateo LS, et al.** Defined microbiota transplant restores Th17/ROR $\gamma$ t<sup>+</sup> regulatory T cell balance in mice colonized with inflammatory bowel disease microbiotas. *Proc. Natl. Acad. Sci.* 2020; **117**:21536–21545.
7. **Collins N, Belkaid Y.** Do the microbiota influence vaccines and protective immunity to pathogens?: Engaging our endogenous adjuvants. *Cold Spring Harb. Perspect. Biol.* 2018; **10**:a028860.
8. **Chai JN, Peng Y, Rengarajan S, Solomon BD, Ai TL, Shen Z, Perry JSA, et al.** Helicobacter species are potent drivers of colonic T cell responses in homeostasis and inflammation. *Sci. Immunol.* 2017; **2**.
9. **Round JL, Mazmanian SK.** Inducible Foxp3<sup>+</sup> regulatory T-cell development by a commensal bacterium of the intestinal microbiota. *Proc. Natl. Acad. Sci.* 2010; **107**:12204–12209.
10. **Wegorzewska MM, Glowacki RWP, Hsieh SA, Donermeyer DL, Hickey CA, Horvath SC, Martens EC, et al.** Diet modulates colonic T cell responses by regulating the expression of a Bacteroides thetaiotaomicron antigen. *Sci. Immunol.* 2019; **4**:eaau9079.
11. **Hegazy AN, West NR, Stubbington MJT, Wendt E, Suijker KIM, Datsi A, This S, et al.**

Circulating and Tissue-Resident CD4(+) T Cells With Reactivity to Intestinal Microbiota Are Abundant in Healthy Individuals and Function Is Altered During Inflammation. *Gastroenterology*. 2017; **153**:1320-1337 e16.

12. **Kuczma MP, Szurek EA, Cebula A, Chassaing B, Jung YJ, Kang SM, Fox JG, et al.** Commensal epitopes drive differentiation of colonic Tregs. *Sci. Adv.* 2020; **6**:eaaz3186.

13. **Hoces D, Greter G, Arnoldini M, Moresi C, Berent S, Kolinko I, Bansept F, et al.** Fitness advantage of *Bacteroides thetaiotaomicron* capsular polysaccharide is dependent on the resident microbiota. *bioRxiv*. 2022:2022.06.19.496708.

14. **Niess JH, Brand S, Gu X, Landsman L, Jung S, McCormick BA, Vyas JM, et al.** CX3CR1-mediated dendritic cell access to the intestinal lumen and bacterial clearance. *Science*. 2005; **307**:254–258.

15. **Macpherson AJ, Uhr T.** Induction of protective IgA by intestinal dendritic cells carrying commensal bacteria. *Science*. 2004; **303**:1662–5.

16. **Geva-Zatorsky N, Sefik E, Kua L, Pasman L, Tan TG, Ortiz-Lopez A, Yanortsang TB, et al.** Mining the Human Gut Microbiota for Immunomodulatory Organisms. *Cell*. 2017; **168**:928-943.e11.

17. **Faith JJ, Ahern PP, Ridaura VK, Cheng J, Gordon JI.** Identifying gut microbe-host phenotype relationships using combinatorial communities in gnotobiotic mice. *Sci. Transl. Med.* 2014; **6**:220ra11.

18. **Feng T, Wang L, Schoeb TR, Elson CO, Cong Y.** Microbiota innate stimulation is a prerequisite for T cell spontaneous proliferation and induction of experimental colitis. *J. Exp. Med.* 2010; **207**:1321–32.

19. **Ansaldo E, Slayden LC, Ching KL, Koch MA, Wolf NK, Plichta DR, Brown EM, et al.** *Akkermansia muciniphila* induces intestinal adaptive immune responses during homeostasis. *Science*. 2019; **364**:1179–1184.

20. **Kwong Chung CKC, Ronchi F, Geuking MB.** Detrimental effect of systemic antimicrobial CD4+ T-cell reactivity on gut epithelial integrity. *Immunology*. 2017; **150**:221–235.

21. **Bennek E, Mandić AD, Verdier J, Roubrocks S, Pabst O, Van Best N, Benz I, et al.** Subcellular antigen localization in commensal *E. coli* is critical for T cell activation and induction of specific tolerance. *Mucosal Immunol.* 2019; **12**:97–107.

22. **Künzli M, Reuther P, Pinschewer DD, King CG.** Opposing effects of T cell receptor signal strength on CD4 T cells responding to acute versus chronic viral infection. *Elife*. 2021; **10**.

23. **Kim KS, Hong SW, Han D, Yi J, Jung J, Yang BG, Lee JY, et al.** Dietary antigens limit mucosal immunity by inducing regulatory T cells in the small intestine. *Science*. 2016; **351**:858–863.
24. **Visekruna A, Hartmann S, Sillke YR, Glauben R, Fischer F, Raifer H, Mollenkopf H, et al.** Intestinal development and homeostasis require activation and apoptosis of diet-reactive T cells. *J. Clin. Invest.* 2019; **129**:1972–1983.
25. **Hadis U, Wahl B, Schulz O, Hardtke-Wolenski M, Schippers A, Wagner N, Müller W, et al.** Intestinal Tolerance Requires Gut Homing and Expansion of FoxP3+ Regulatory T Cells in the Lamina Propria. *Immunity*. 2011; **34**:237–246.
26. **Cong Y, Feng T, Fujihashi K, Schoeb TR, Elson CO.** A dominant, coordinated T regulatory cell-IgA response to the intestinal microbiota. *Proc. Natl. Acad. Sci. U. S. A.* 2009; **106**:19256–61.
27. **Hepworth MR, Fung TC, Masur SH, Kelsen JR, McConnell FM, Dubrot J, Withers DR, et al.** Immune tolerance. Group 3 innate lymphoid cells mediate intestinal selection of commensal bacteria-specific CD4+ T cells. *Science*. 2015; **348**:1031–5.
28. **Mombaerts P, Iacomini J, Johnson RS, Herrup K, Tonegawa S, Papaioannou VE.** RAG-1-deficient mice have no mature B and T lymphocytes. *Cell*. 1992; **68**:869–77.
29. **Lahl K, Loddenkemper C, Drouin C, Freyer J, Arnason J, Eberl G, Hamann A, et al.** Selective depletion of Foxp3+ regulatory T cells induces a scurfy-like disease. *J. Exp. Med.* 2007; **204**:57–63.
30. **Oxenius A, Bachmann MF, Zinkernagel RM, Hengartner H.** Virus-specific major MHC class II-restricted TCR-transgenic mice: effects on humoral and cellular immune responses after viral infection. *Eur. J. Immunol.* 1998; **28**:390–400.
31. **Koropatkin NM, Martens EC, Gordon JI, Smith TJ.** Starch Catabolism by a Prominent Human Gut Symbiont Is Directed by the Recognition of Amylose Helices. *Structure*. 2008; **16**:1105–1115.
32. **Wang J, Shoemaker NB, Wang GR, Salyers AA.** Characterization of a *Bacteroides* mobilizable transposon, NBU2, which carries a functional lincomycin resistance gene. *J. Bacteriol.* 2000; **182**:3559–71.
33. **Moore SJ, Lai HE, Kelwick RJR, Chee SM, Bell DJ, Polizzi KM, Freemont PS.** EcoFlex: A Multifunctional MoClo Kit for *E. coli* Synthetic Biology. *ACS Synth. Biol.* 2016; **5**:1059–1069.
34. **Jong WSP, Schillemans M, ten Hagen-Jongman CM, Luirink J, van Ulsen P.** Comparing autotransporter  $\beta$ -domain configurations for their capacity to secrete heterologous



proteins to the cell surface. *PLoS One*. 2018; **13**:1–23.

35. **Moor K, Fadlallah J, Toska A, Sterlin D, Balmer ML, Macpherson AJ, Gorochov G, et al.** Analysis of bacterial-surface-specific antibodies in body fluids using bacterial flow cytometry. *Nat Protoc*. 2016; **11**:1531–1553.

## SUPPORTING INFORMATION

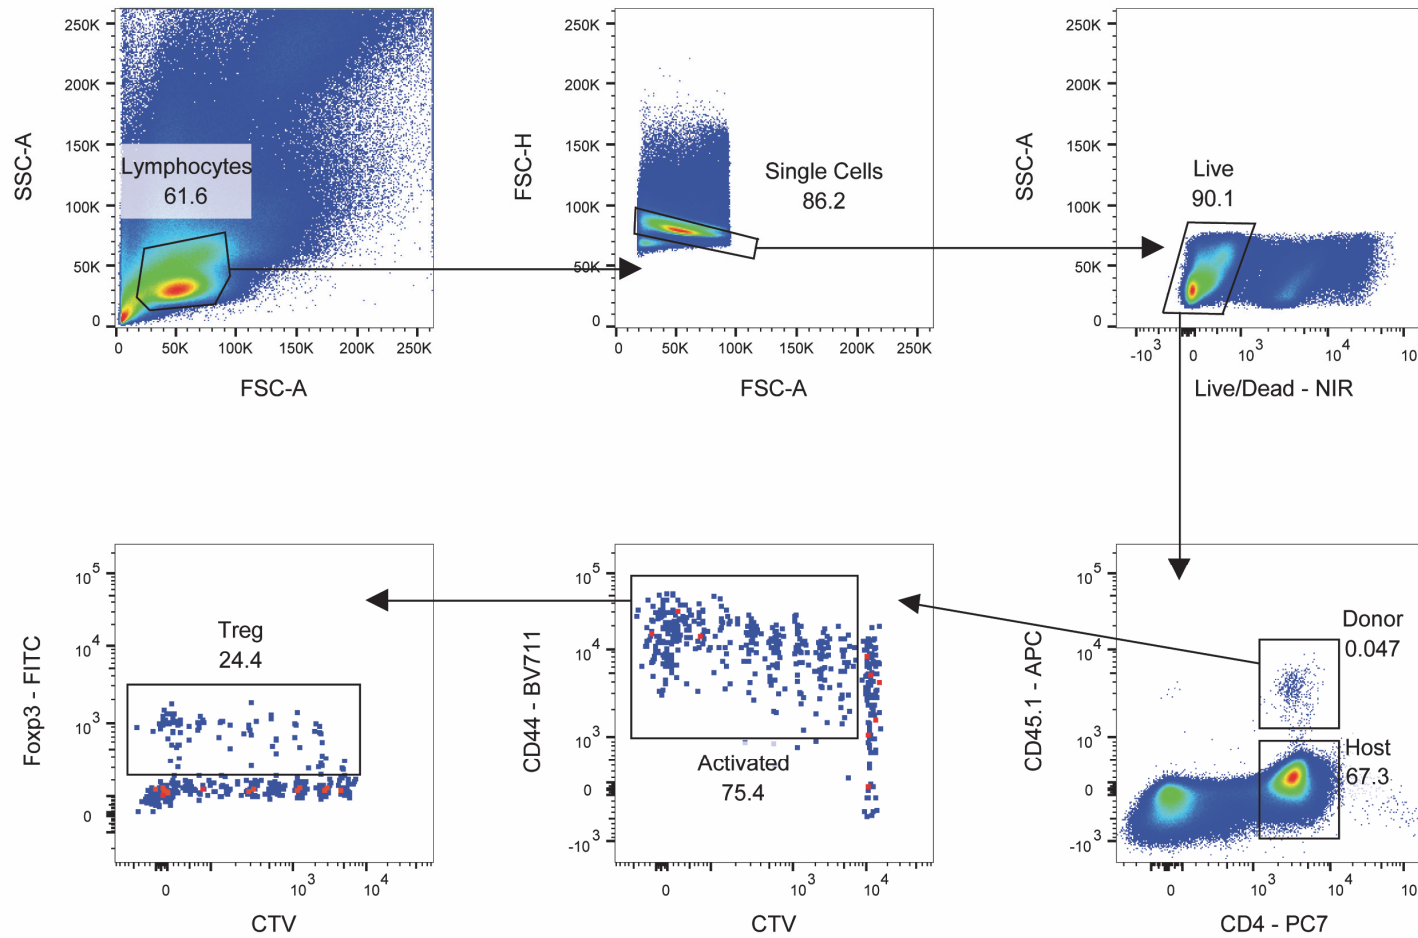

**Supplementary Figure 1: Gating strategy.** After gating for live single-cell lymphocytes, donor B0OM CD4+ T cells were identified by the expression CD45.1. Activated B0OM T cells were gated by their expression of CD44 and dilution of the CTV proliferation dye. Controls as showed in Fig.1B were used to define the diluted and undiluted populations for the CTV dye.

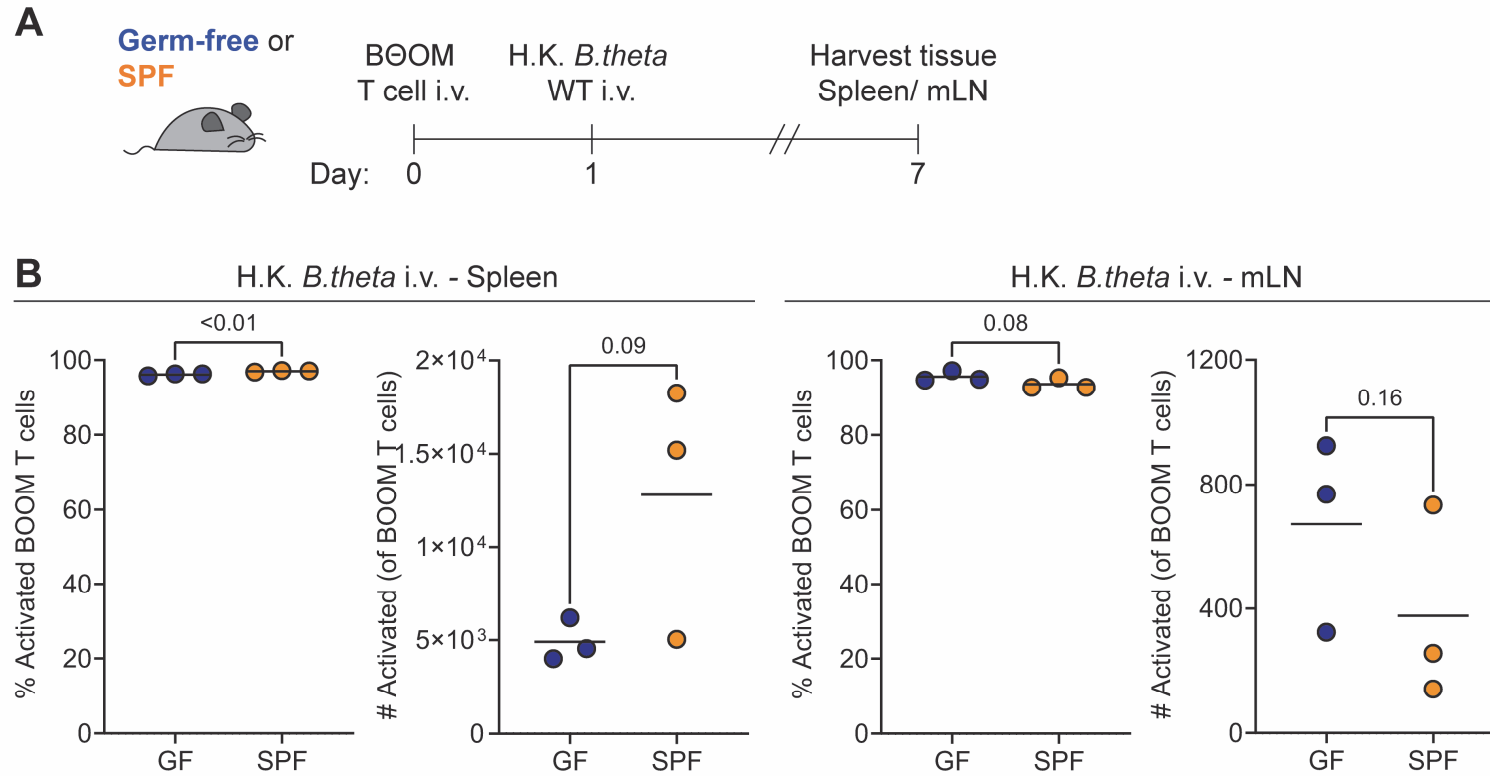

**Supplementary Figure 2: *B.theta* induce similar activation of B0OM T cells by systemic challenge in GF and SPF mice. (A)** Experimental set-up of *B.theta* systemic challenge. **(B and C)** Percentage and number of activated B0OM T cells in GF and SPF mice both in **(B)** spleen and **(C)** mLN.

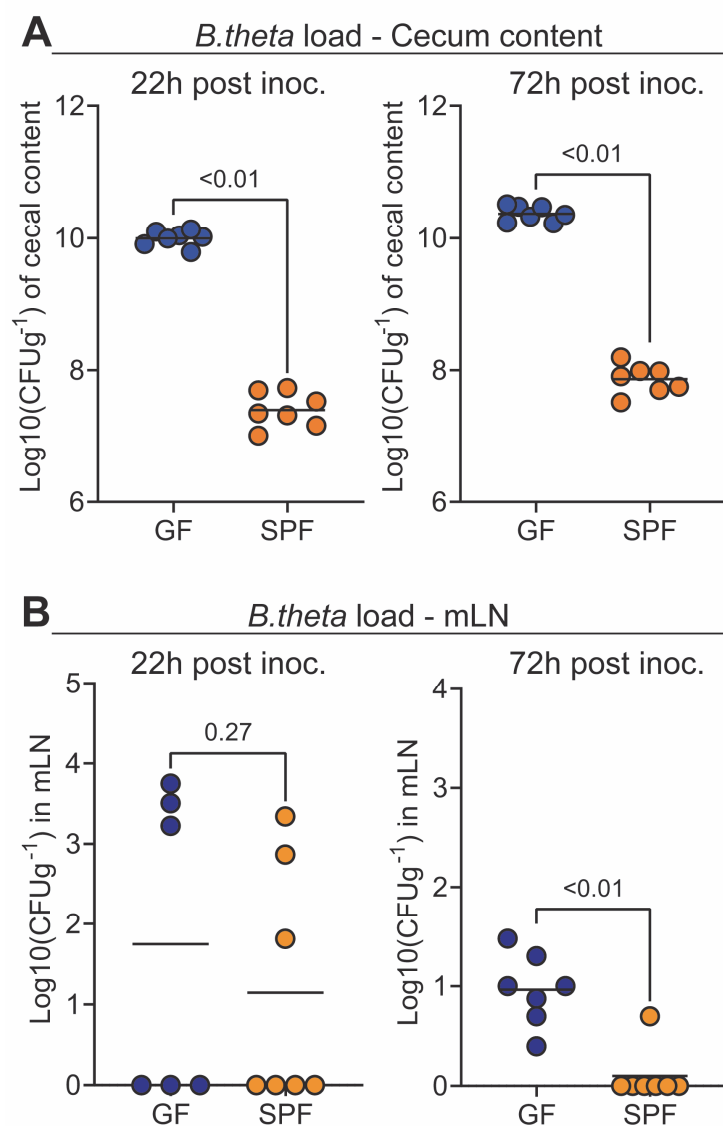

**Supplementary Figure 3: Bacterial load in gut lumen and mLN. (A and B)** *B.theta* CFUs recovered from (A) cecum content and (B) mLNs of GF and SPF mice after 22 and 72 hours post oral inoculation.

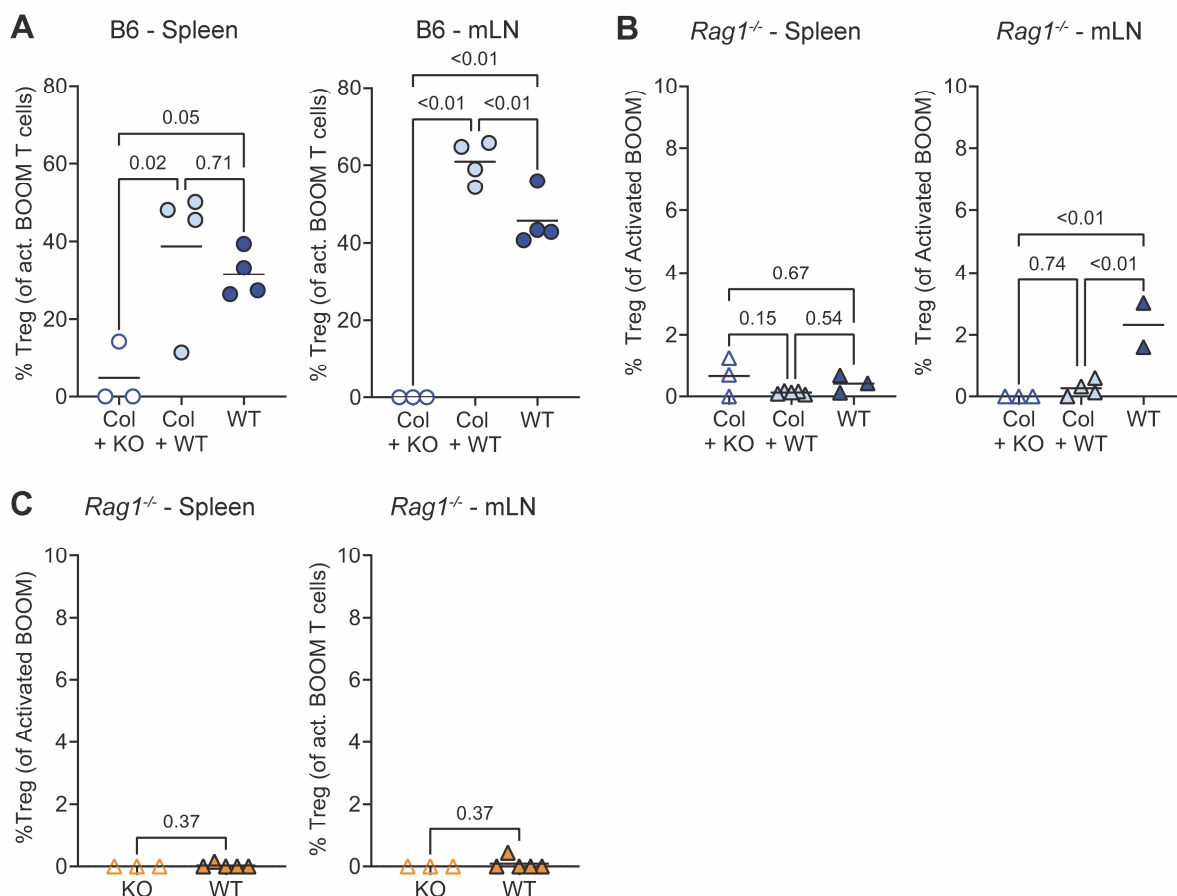

**Supplementary Figure 4: Bacterial load in gut lumen and induced BOOM regulatory T cells. (A-C)** Percentage of regulatory T cells (Treg) among activated BOOM T cells in spleen and mLN. **(A)** Related to experiments described in Fig.2B-C, **(B)** Related to experiments described in Fig.2D-E. **(C)** Related to experiments described in Fig.2G-H.

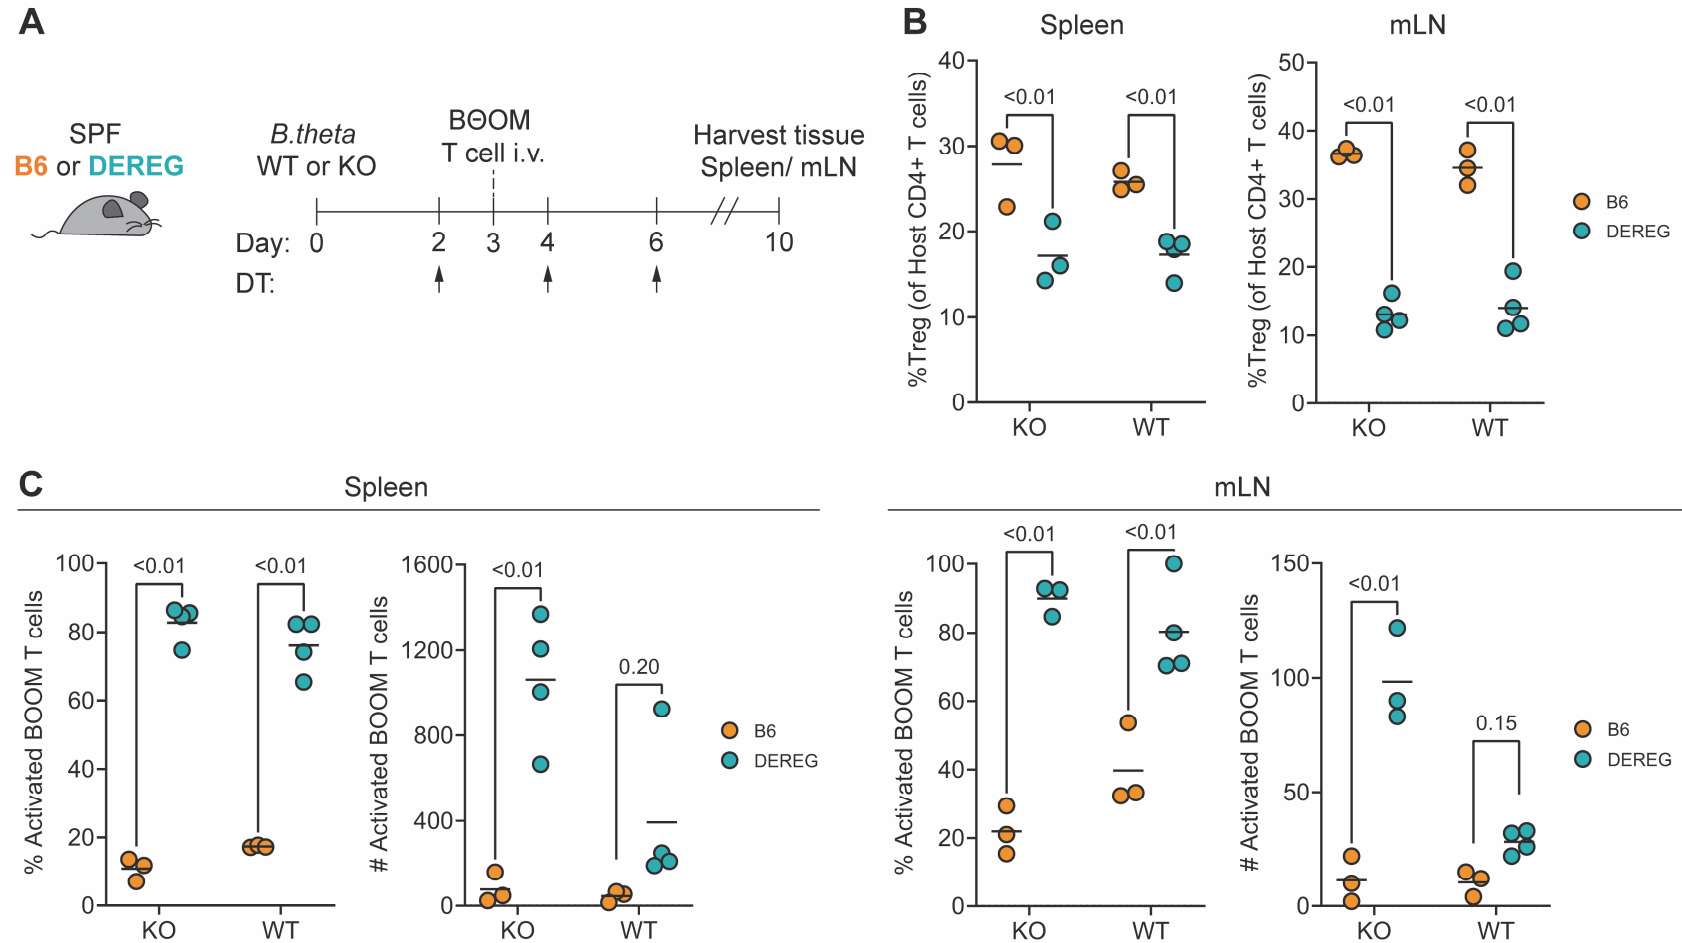

**Supplementary Figure 5: Acute depletion of regulatory T cells (Tregs).** (A) Experimental set-up for acute regulatory T cell (Treg) depletion in DEREK mice. (B) Percentage of host Tregs among CD4+T cells at the end of the experiment in spleen and mLN. (C) Percentage and number of activated BOOM T cells in B6 and DEREK mice both in spleen and mLN.

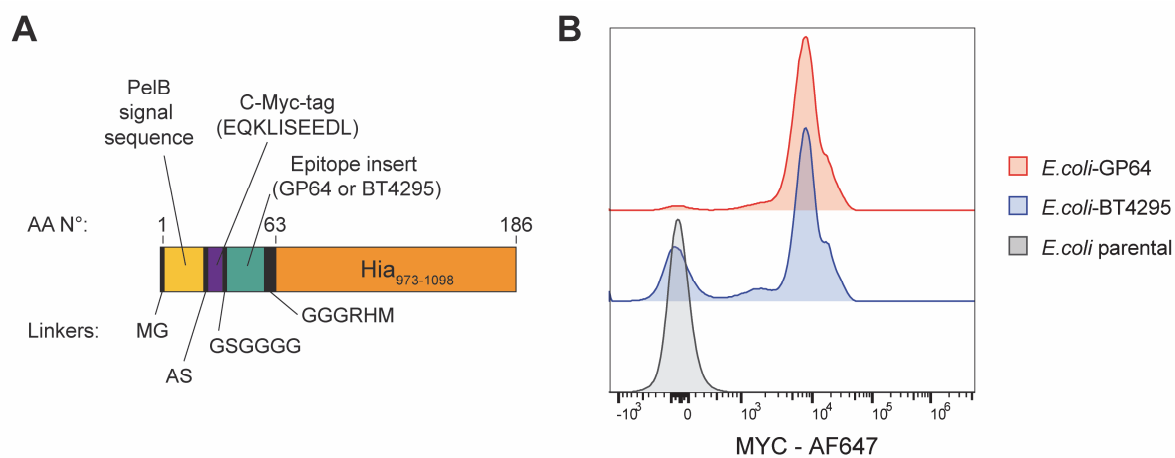

**Supplementary Figure 6: (A)** Schematic representation of plasmid insert construct for expressing surface epitopes. **(B)** Representative flow cytometry plots depicted surface expression of epitopes in *E. coli* strains.

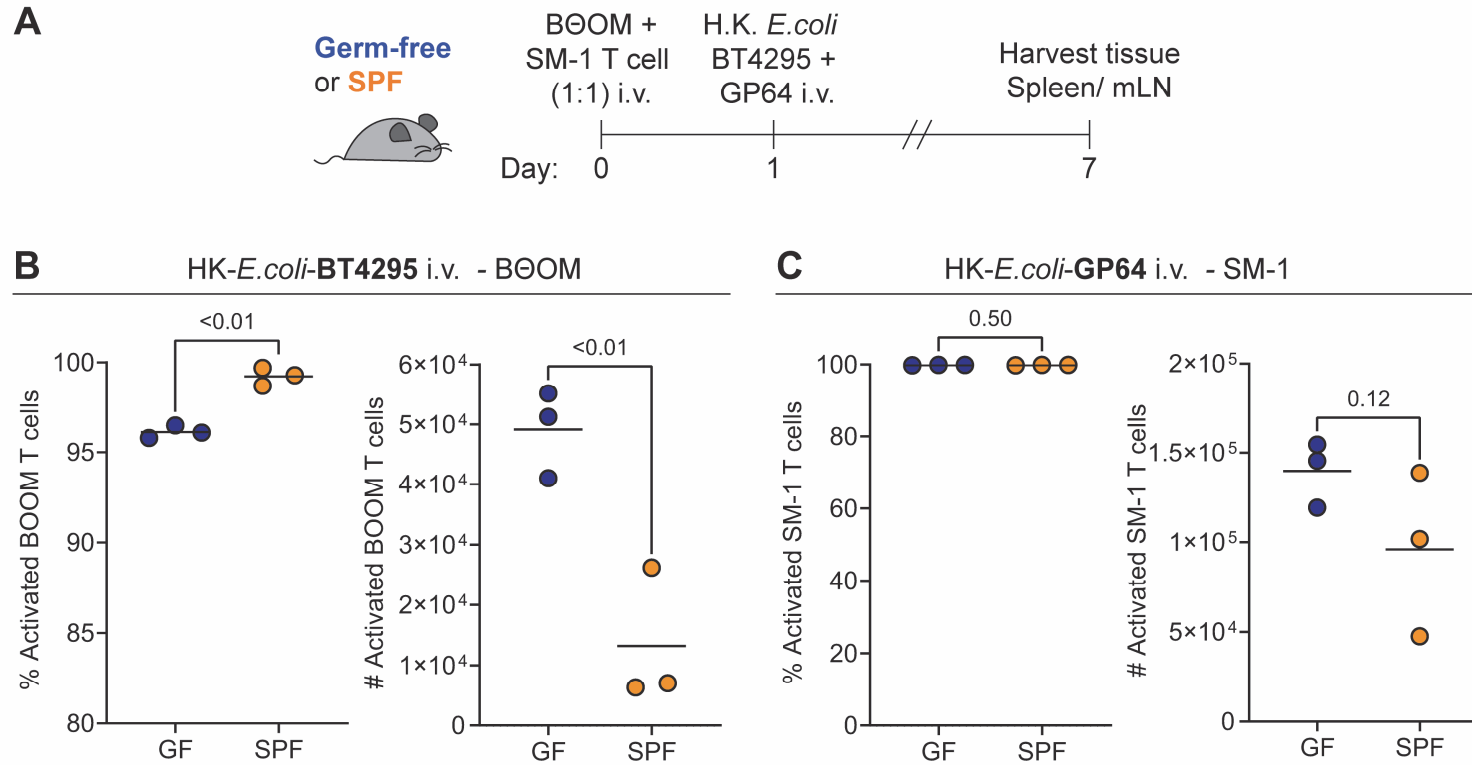

**Supplementary Figure 7: Systemic challenge with *E. coli*-BT4295 and *E. coli*-GP64.** (A) Experimental set-up of *E. coli*-BT4295 and *E. coli*-GP64 systemic challenge in GF and SPF mice. B0OM and SM-1 T cells were transferred at a 1:1 ratio one day before challenge with inactivated *E. coli*-BT4295 and *E. coli*-GP64. (B) Percentage and number of activated B0OM T cells in GF and SPF mice both in spleen. (C) Percentage and number of activated SM-1 T cells in GF and SPF mice both in spleen.



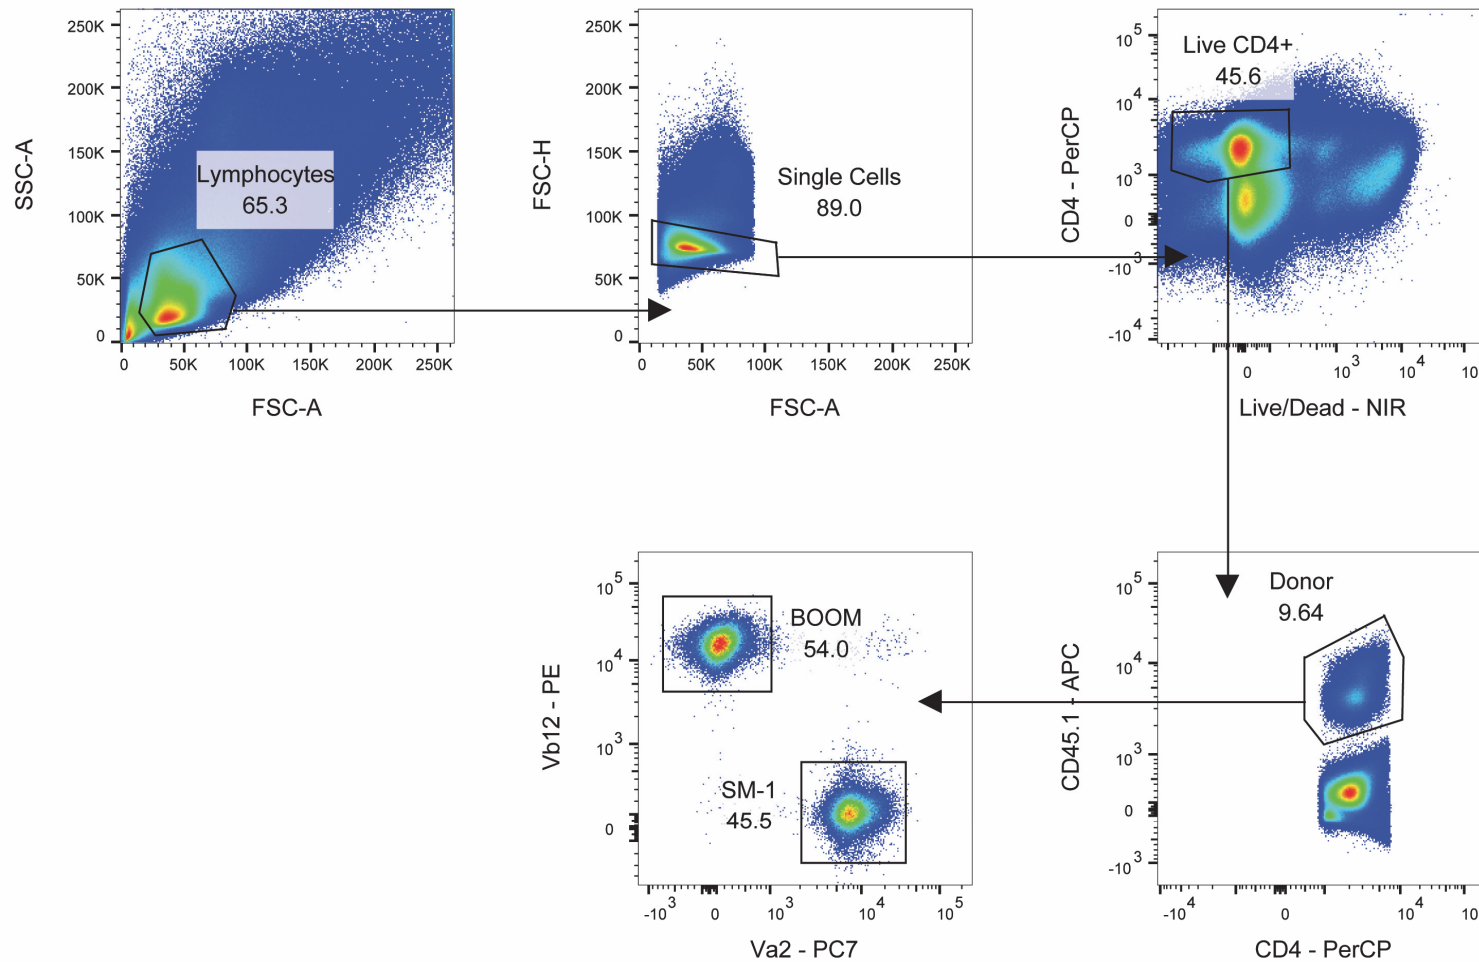

**Supplementary Figure 8: Gating strategy.** After gating for live single-cell lymphocytes, donor CD4+ T cells were identified by the expression CD45.1. B00M and SM-1 T cells were gated by their expression of their corresponding TCR chain (V $\beta$ 12 for B00M and Va2 for SM-1). Activated T cells were identified by CD44 and dilution of the CTV proliferation dye as in Supplementary Figure 1.

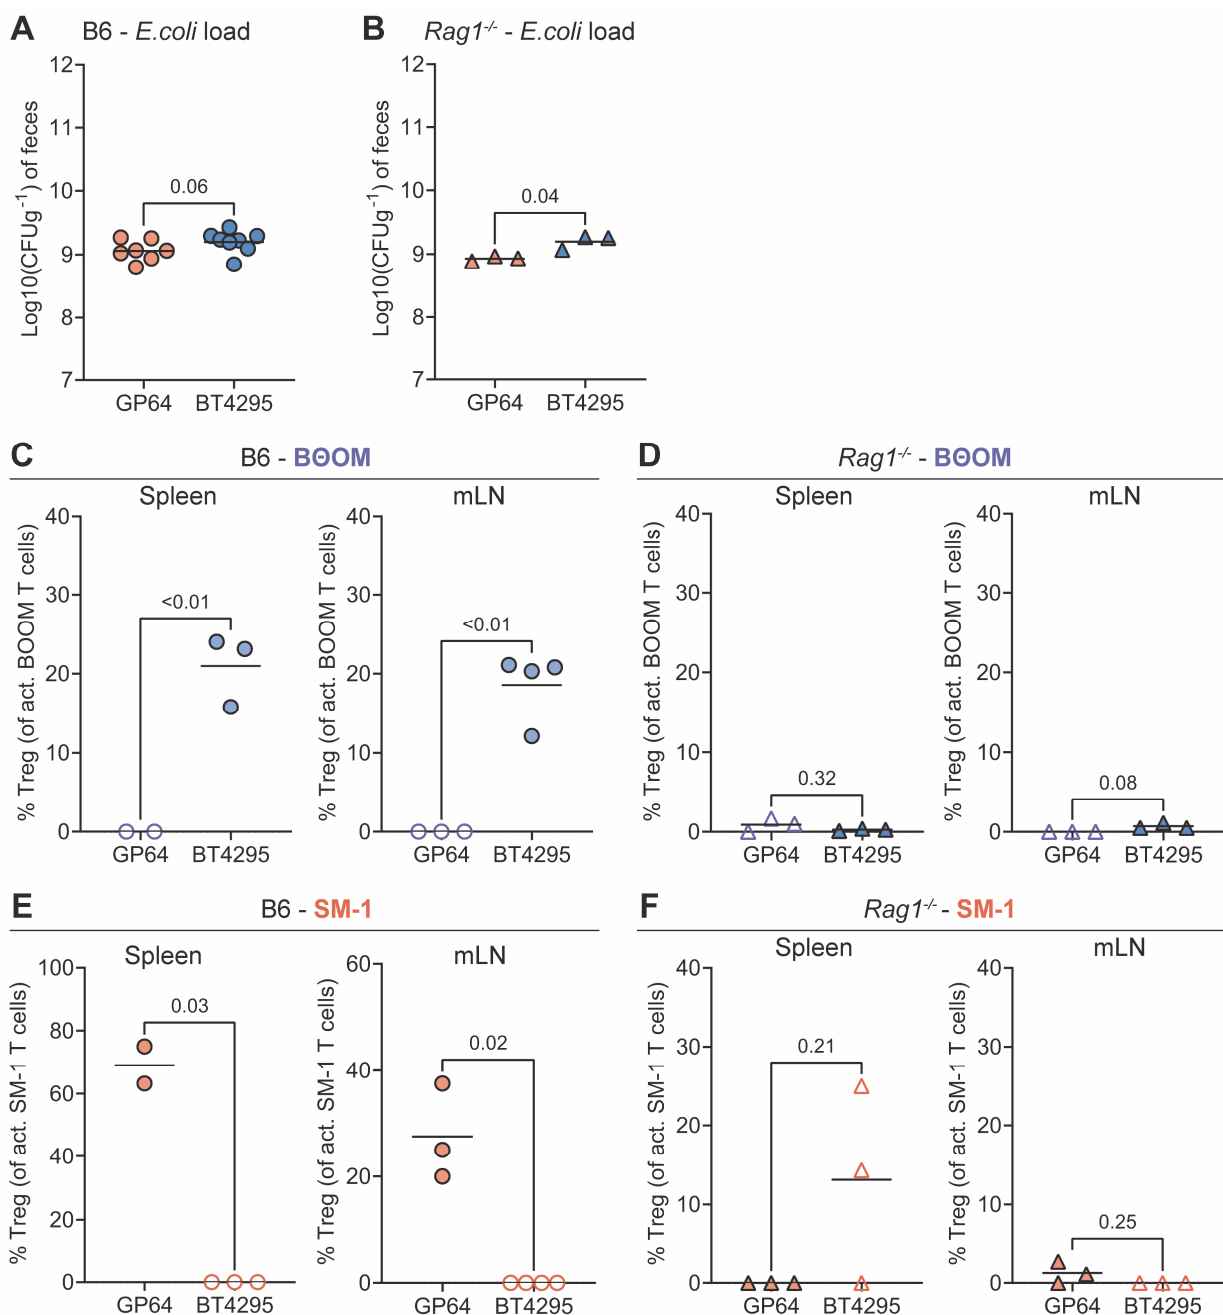

**Supplementary Figure 9: Bacterial load in gut lumen and induced regulatory T cells (Tregs) in B00M and SM-1 T cells. (A and B) *E.coli* strain luminal load in feces at the day of adoptive T cell transfer in (A) B6 and (B) *Rag1*<sup>-/-</sup>. (C-D) Percentage of Tregs among activated B00M T cells in (C) B6 and (D) *Rag1*<sup>-/-</sup>. (E-F) Percentage of Tregs among activated SM-1 T cells in (E) B6 and (F) *Rag1*<sup>-/-</sup>.**

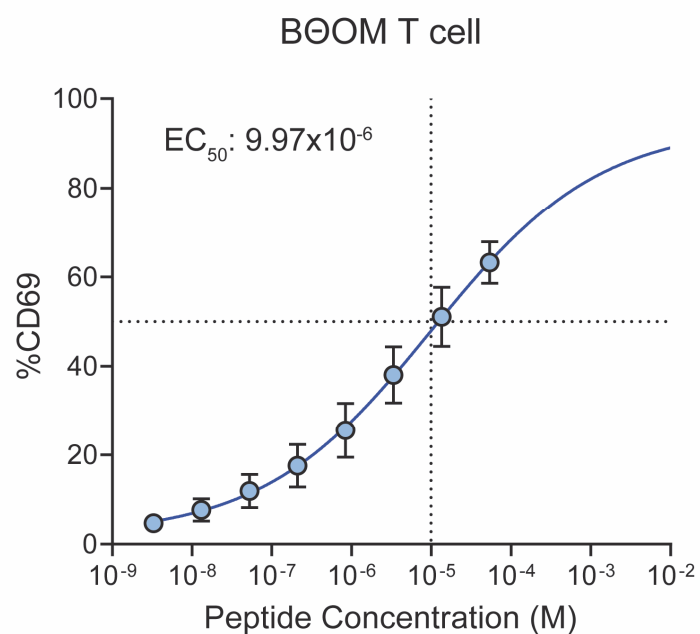

**Supplementary Figure 10: Peptide dose-activation curves.** BΘOM T cells were cultured overnight with BT4295 peptide-pulsed splenocytes. The percentage of CD69+ BΘOM T cells is used as a readout for activation. (n=30 per dilution, each dot represents mean and bars standard deviation)
